# Supplementary material for: Youth Mental Health Tracker: protocol to establish a longitudinal cohort and research database for young people attending Australian mental health services
Source: PubMed Central journal article supplement — BMJ Open. 2020 Jun 7;10(6):e035379. doi: 10.1136/bmjopen-2019-035379 (PMC7282334; doi:10.1136/bmjopen-2019-035379), 2020-06-07
Supplement: bmjopen-2019-035379.draft_revisions.pdf [file bmjopen-2019-035379.draft_revisions.pdf]

# BMJ Open

BMJ Open is committed to open peer review. As part of this commitment we make the peer review history of every article we publish publicly available.

When an article is published we post the peer reviewers' comments and the authors' responses online. We also post the versions of the paper that were used during peer review. These are the versions that the peer review comments apply to.

The versions of the paper that follow are the versions that were submitted during the peer review process. They are not the versions of record or the final published versions. They should not be cited or distributed as the published version of this manuscript.

BMJ Open is an open access journal and the full, final, typeset and author-corrected version of record of the manuscript is available on our site with no access controls, subscription charges or pay-per-view fees (<http://bmjopen.bmj.com>).

If you have any questions on BMJ Open's open peer review process please email [info.bmjopen@bmj.com](mailto:info.bmjopen@bmj.com)

# BMJ Open

## Youth Mental Health Tracker: Protocol to establish a longitudinal cohort and research database for young people attending Australian mental health services.

|                               |                                                                                                                                                                                                                                                                                                                                                                                                                                                                                                                                                                                                                                                                                                                                                                                                                                                                                                                                                                                                                                                                                                                                                                                               |
|-------------------------------|-----------------------------------------------------------------------------------------------------------------------------------------------------------------------------------------------------------------------------------------------------------------------------------------------------------------------------------------------------------------------------------------------------------------------------------------------------------------------------------------------------------------------------------------------------------------------------------------------------------------------------------------------------------------------------------------------------------------------------------------------------------------------------------------------------------------------------------------------------------------------------------------------------------------------------------------------------------------------------------------------------------------------------------------------------------------------------------------------------------------------------------------------------------------------------------------------|
| Journal:                      | <i>BMJ Open</i>                                                                                                                                                                                                                                                                                                                                                                                                                                                                                                                                                                                                                                                                                                                                                                                                                                                                                                                                                                                                                                                                                                                                                                               |
| Manuscript ID                 | bmjopen-2019-035379                                                                                                                                                                                                                                                                                                                                                                                                                                                                                                                                                                                                                                                                                                                                                                                                                                                                                                                                                                                                                                                                                                                                                                           |
| Article Type:                 | Protocol                                                                                                                                                                                                                                                                                                                                                                                                                                                                                                                                                                                                                                                                                                                                                                                                                                                                                                                                                                                                                                                                                                                                                                                      |
| Date Submitted by the Author: | 30-Oct-2019                                                                                                                                                                                                                                                                                                                                                                                                                                                                                                                                                                                                                                                                                                                                                                                                                                                                                                                                                                                                                                                                                                                                                                                   |
| Complete List of Authors:     | Rohleder, Cathrin; The University of Sydney, Brain and Mind Centre<br>Song, Yun; The University of Sydney, Brain and Mind Centre<br>Crouse, Jacob; The University of Sydney, Brain and Mind Centre<br>Davenport, Tracey; The University of Sydney, Brain and Mind Centre<br>Iorfino, Frank; The University of Sydney, Brain and Mind Centre<br>Hamilton, Blake; The University of Sydney, Brain and Mind Centre<br>Zmicerevska, Natalia; The University of Sydney, Brain and Mind Centre<br>Nichles, Alissa; The University of Sydney, Brain and Mind Centre<br>Carpenter, Joanne; The University of Sydney, Brain and Mind Centre<br>Tickell, Ashleigh; The University of Sydney, Brain and Mind Centre<br>Wilson, Chloe; The University of Sydney, Brain and Mind Centre<br>Cross, Shane; The University of Sydney, Brain and Mind Centre<br>Guastella, Adam; The University of Sydney, Brain and Mind Centre<br>Koethe, Dagmar; The University of Sydney, Brain and Mind Centre<br>Leweke, F. Markus; The University of Sydney, Brain and Mind Centre<br>Scott, Elizabeth; The University of Sydney, Brain and Mind Centre<br>Hickie, Ian; The University of Sydney, Brain and Mind Centre |
| Keywords:                     | MENTAL HEALTH, Child & adolescent psychiatry < PSYCHIATRY, Anxiety disorders < PSYCHIATRY, Depression & mood disorders < PSYCHIATRY, Schizophrenia & psychotic disorders < PSYCHIATRY                                                                                                                                                                                                                                                                                                                                                                                                                                                                                                                                                                                                                                                                                                                                                                                                                                                                                                                                                                                                         |
|                               |                                                                                                                                                                                                                                                                                                                                                                                                                                                                                                                                                                                                                                                                                                                                                                                                                                                                                                                                                                                                                                                                                                                                                                                               |

SCHOLARONE™  
Manuscripts

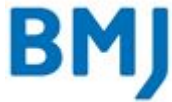

I, the Submitting Author has the right to grant and does grant on behalf of all authors of the Work (as defined in the below author licence), an exclusive licence and/or a non-exclusive licence for contributions from authors who are: i) UK Crown employees; ii) where BMJ has agreed a CC-BY licence shall apply, and/or iii) in accordance with the terms applicable for US Federal Government officers or employees acting as part of their official duties; on a worldwide, perpetual, irrevocable, royalty-free basis to BMJ Publishing Group Ltd ("BMJ") its licensees and where the relevant Journal is co-owned by BMJ to the co-owners of the Journal, to publish the Work in this journal and any other BMJ products and to exploit all rights, as set out in our [licence](#).

The Submitting Author accepts and understands that any supply made under these terms is made by BMJ to the Submitting Author unless you are acting as an employee on behalf of your employer or a postgraduate student of an affiliated institution which is paying any applicable article publishing charge ("APC") for Open Access articles. Where the Submitting Author wishes to make the Work available on an Open Access basis (and intends to pay the relevant APC), the terms of reuse of such Open Access shall be governed by a Creative Commons licence – details of these licences and which [Creative Commons](#) licence will apply to this Work are set out in our licence referred to above.

Other than as permitted in any relevant BMJ Author's Self Archiving Policies, I confirm this Work has not been accepted for publication elsewhere, is not being considered for publication elsewhere and does not duplicate material already published. I confirm all authors consent to publication of this Work and authorise the granting of this licence.

1  
2  
3 Youth Mental Health Tracker: Protocol to establish a longitudinal  
4  
5  
6 cohort and research database for young people attending Australian  
7  
8  
9  
10 mental health services.  
11  
12  
13  
14

15 Cathrin Rohleder<sup>1</sup>, Yun Ju Christine Song<sup>1</sup>, Jacob J Crouse<sup>1</sup>, Tracey A Davenport<sup>1</sup>, Frank Iorfino<sup>1</sup>,  
16  
17 Blake Hamilton<sup>1</sup>, Natalia Zmicereskva<sup>1</sup>, Alissa Nichles<sup>1</sup>, Joanne S Carpenter<sup>1</sup>, Ashleigh M  
18  
19 Tickell<sup>1</sup>, Chloe Wilson<sup>1</sup>, Shane P Cross<sup>1</sup>, Adam J Guastella<sup>1</sup>, Dagmar Koethe<sup>1</sup>, F. Markus  
20  
21 Leweke<sup>1</sup>, Elizabeth M Scott<sup>1,2</sup>, Ian B Hickie<sup>1</sup>  
22  
23  
24  
25  
26

27 <sup>1</sup> Brain and Mind Centre, University of Sydney, Sydney, NSW, Australia.  
28  
29

30 <sup>2</sup> University of Notre Dame Australia, Sydney, NSW, Australia  
31  
32  
33  
34

35 Corresponding author:  
36

37 Cathrin Rohleder  
38

39 Brain and Mind Centre, The University of Sydney  
40

41 94 Mallett Street, Camperdown, Sydney 2006, NSW, Australia  
42  
43

44 cathrin.rohleder@sydney.edu.au  
45  
46  
47  
48  
49

50 Word Count: 2,144 (without Abstract, Article Summary, References, Statements, and Legends)  
51  
52  
53

54 Key Words:  
55

56 Humans, Adolescent, Longitudinal Studies, Mental Health, Early Intervention, Secondary  
57  
58 Prevention  
59  
60

## Abstract

**Introduction** Mental disorders are a leading cause of long-term disability worldwide. Much of the burden of mental ill health is mediated by early onset, comorbidities with physical health conditions, and chronicity of the illnesses. This study aims to track the early period of mental disorders amongst young people presenting to Australian mental health services to facilitate: more streamlined transdiagnostic processes; highly personalised and measurement-based care; secondary prevention; and enhanced long-term outcomes.

**Methods and analysis** Recruitment to this large-scale, multi-site, prospective, transdiagnostic, longitudinal clinical cohort study (*Youth Mental Health Tracker*) will be offered to all young people between the ages of 12 and 30 years presenting to participating services with proficiency in English and no history of intellectual disability. Young people will be tracked over three years with standardised assessments at baseline and three, six, 12, 24, and 36 months. Assessments will include self-report and clinician-administered measures, covering five key domains including: (1) social and occupational function; (2) self-harm, suicidal thoughts and behaviour; (3) alcohol or other substance misuse; (4) physical health; and (5) illness type, clinical stage and trajectory. Data collection will be facilitated by the use of a health information technology. The data will be used to: (1) determine prospectively the course of multi-dimensional functional outcomes, based on the differential impact of demographics, medication, psychological interventions, and other key potentially modifiable moderator variables; and (2) map pathophysiological mechanisms and clinical illness trajectories to determine transition rates of young people to more severe illness forms.

**Ethics and dissemination** The study has been reviewed and approved by the Human Research Ethics Committee of the Sydney Local Health District (SLHD, 2019/ETH00469). All data will be

1  
2  
3 non-identifiable and research findings will be disseminated through peer-reviewed journals  
4  
5 and scientific conference presentations.  
6  
7  
8  
9

## 10 Article Summary

11  
12  
13 Strengths and limitations of this study:

- 14  
15  
16 • This study focusses on presentation care, rather than diagnosis-based, recruitment to  
17  
18 establish a comprehensive and transdiagnostic longitudinal cohort and research  
19  
20 database of young people attending Australian mental health services.  
21  
22
- 23  
24 • Our aim is to track up to 5,000 young people (aged between 12 and 30 years) over a  
25  
26 three-year period.  
27
- 28  
29 • The use of our multi-dimensional outcomes framework enables comprehensive  
30  
31 assessment of young people as well as routine monitoring.  
32
- 33  
34 • The study does not yet include standardised objective measures such as biomarker,  
35  
36 data on brain structure and function, and neuropsychological assessments.  
37
- 38  
39 • The study is part of a clinical trials framework evaluating the utility of our  
40  
41 multidimensional outcomes framework as well as our pathophysiological mechanism  
42  
43 and illness trajectory model.  
44  
45  
46  
47  
48  
49  
50  
51  
52  
53  
54  
55  
56  
57

## 58 Introduction

59  
60

1  
2  
3 Mental disorders are a leading cause of premature death and persistent disability worldwide.<sup>1-4</sup>

4  
5  
6 <sup>4</sup> In those aged 10 to 24 years, neuropsychiatric disorders contribute more than any other  
7  
8 cause to the global burden of disease.<sup>5</sup> In addition to the early age of onset of mental  
9  
10 disorders, factors including their prevalence, chronicity, comorbidity with physical illness, risky  
11  
12 alcohol or other substance use, and high suicide risk and self-harm behaviour significantly  
13  
14 contribute to significant disability and premature mortality.<sup>6-15</sup> Consequently, earlier  
15  
16 identification, personalised early interventions, secondary prevention, and enhanced long-  
17  
18 term care in the early phases of these disorders are key priorities to reduce persistent  
19  
20 disability and premature mortality.<sup>16-18</sup>

21  
22  
23  
24  
25  
26  
27  
28 In order to better characterise the individual needs and enable highly personalised and  
29  
30 measurement-based care, we have proposed the use of a multi-dimensional outcomes  
31  
32 framework.<sup>15, 19-21</sup> This framework comprises five key domains, namely:

- 33  
34  
35 • social and occupational function;
- 36  
37 • self-harm, suicidal thoughts and behaviours;
- 38  
39 • alcohol or other substance misuse;
- 40  
41 • physical health; and
- 42  
43 • illness type, clinical stage, and trajectory.
- 44  
45  
46  
47  
48  
49

50  
51 These domains can be assessed by using various freely accessible validated scales and  
52  
53 standardised questionnaires<sup>20</sup>. New health information technologies (HIT), such as the  
54  
55 InnoWell Platform (Project Synergy, InnoWell Pty Ltd)<sup>22</sup>, can facilitate the delivery of such  
56  
57 comprehensive assessments, as they allow clinicians to implement time-efficient self-report  
58  
59  
60

1  
2  
3 versions of the scales and questionnaires that can often be completed by consumers without  
4  
5 guidance.<sup>20</sup>  
6  
7  
8  
9

10 The assessment and identification of individual needs in each domain may prove to be  
11 particularly valuable, as it allows clinicians to develop highly personalised care options  
12 targeting specific factors associated with illness persistence and more significant disability  
13 across disorders (e.g. functional impairment, physical illnesses, risky alcohol or other  
14 substance use, and high suicide risk and self-harm behaviour).<sup>19, 23</sup>  
15  
16  
17  
18  
19  
20  
21  
22  
23  
24

25 Young people presenting to mental health services commonly experience a variety of  
26 symptoms that are often less specific (e.g. anxiety, high level of psychological distress, sleep  
27 problems, mood instability, variable psychosocial function) and not yet sufficiently severe to  
28 meet thresholds for assigning specific diagnostic categories. Thus, current syndrome-focused  
29 classification systems, and their matching clinical guidelines, often map poorly onto the earlier  
30 phases of mental illness.<sup>18, 24-28</sup> A transdiagnostic clinical staging model has been proposed as  
31 an adjunct to formal diagnosis in order to address this problem. The clinical staging model  
32 reflects the progression of mental disorders and is based on the staging concept used in  
33 general medicine, wherein more advanced stages are associated with a poorer prognosis and  
34 a need for more intensive interventions with a higher risk-to-benefit ratio.<sup>18, 29</sup> General  
35 medicine also shows that an understanding of underlying pathophysiological mechanisms is  
36 crucial for selecting optimal treatment. Identifying mood and psychotic syndromes (including  
37 anxiety, depression, bipolar disorder, psychosis) based on pathophysiology will allow clinicians  
38 to select treatment options targeting underlying causes and, thus, eventually lead to improved  
39 clinical outcomes.<sup>30</sup>  
40  
41  
42  
43  
44  
45  
46  
47  
48  
49  
50  
51  
52  
53  
54  
55  
56  
57  
58  
59  
60



1  
2  
3 We have proposed three underlying pathophysiological mechanisms (neurodevelopmental  
4 abnormalities, hyperarousal, circadian dysfunction), which over time influence individual  
5  
6 illness trajectories to three different illness types, namely psychosis, anxious depression, and  
7  
8 bipolar spectrum disorders, respectively.<sup>18, 31</sup> Importantly, there is a degree of overlap  
9  
10 between the three pathways at all stages of illness. Previously, we have shown in a similar  
11  
12 cohort study that 27% of young people with emerging mental disorders progress across stages  
13  
14 and between pathways throughout care. This included 13% progressing between pathways  
15  
16 whilst developing more specific and severe symptoms.<sup>18</sup> Continuous tracking of long-term  
17  
18 outcomes will provide detailed information on these individual trajectories and factors  
19  
20 influencing them, and, most importantly, will allow for early identification of changing needs  
21  
22 that require adjustments of individual interventions. Furthermore, the information on clinical  
23  
24 illness trajectories of young people can be used to determine transition rates to more severe  
25  
26 illness forms (e.g. severe depression, bipolar or psychotic disorder) and may help to better  
27  
28 understand which factors drive the progression of illness.  
29  
30  
31  
32  
33  
34  
35  
36  
37

### 38 Objectives of the study and conceptual framework

39  
40  
41 Mental disorders emerge early in life and evolve dynamically over time. The longitudinal  
42  
43 '*Youth Mental Health Tracker*' study aims to better understand the complex and variable  
44  
45 clinical course (trajectories and pathophysiological mechanisms) of mental disorders and their  
46  
47 impacts over time by tracking long-term multidimensional outcomes in a youth mental health  
48  
49 cohort.  
50  
51

52  
53 Standardised multi-dimensional clinical information will be routinely and confidentially  
54  
55 collected across participating services. The study involves multiple longitudinal assessments  
56  
57 so that key illness outcomes (i.e., social and occupational function, self-harm, suicidal  
58  
59 thoughts and behaviour, alcohol or other substance misuse, physical health; and illness type,  
60

1  
2  
3 clinical stage, and trajectory) can be measured and tracked over time. Importantly, this allows  
4  
5 for the detection of treatment non-responders at an early stage of illness; that is, before  
6  
7 extensive exposure to interventions and chronic manifestation of illness.  
8  
9

10  
11  
12 In summary, such standardised data collection will enable improved identification,  
13  
14 characterisation and profiling of mental disorders in young people; thus, enabling the  
15  
16 identification of new targets and mechanisms that can be translated into more streamlined  
17  
18 transdiagnostic processes, the development of the next generation of highly personalised  
19  
20 interventions, and health service strategies that greatly enhance care for young people.  
21  
22  
23  
24  
25  
26

## 27 28 Methods and analysis

### 29 30 31 Study design and setting

32  
33 This is a large-scale, multi-site, prospective, transdiagnostic, longitudinal clinical cohort study  
34  
35 (*Youth Mental Health Tracker*), with the Brain and Mind Centre (including *headspace*  
36  
37 Camperdown, and Early Intervention and High Intensity Services; public health organisation)  
38  
39 at the University of Sydney (Sydney, Australia), being the lead site for this study. Further, St  
40  
41 Vincent's Private Hospital (USpace) (private health organisation) will be another participating  
42  
43 site in Sydney, Australia. Thus, this study involves specialist and enhanced primary-care based  
44  
45 youth mental health services.  
46  
47  
48  
49  
50

51  
52  
53 For the collection and storage of routine clinical data across sites, a HIT system will facilitate  
54  
55 the data extraction and use in a de-identified manner for research purposes.  
56  
57  
58  
59  
60

1  
2  
3 The study is expected to start in late 2019. Participants will be tracked over three years with  
4  
5 standardised assessments occurring at baseline and three, six, 12, 24, and 36 months.  
6  
7  
8  
9

## 10 11 Patient and public involvement

12  
13  
14 The health information technology (HIT) system (InnoWell Platform (InnoWell Pty Ltd)<sup>22</sup> that  
15  
16 will be used by sites participating in the study for self-report assessments was developed with  
17  
18 patient and public involvement and has been approved as medical device by the Australian  
19  
20 Register of Therapeutic Goods (ARTG ID: 315030).<sup>32</sup>  
21  
22  
23  
24  
25  
26  
27

## 28 Study Population

29  
30 This study focusses on young people seeking treatment for emergent mood and psychotic  
31  
32 syndromes and aims to establish a comprehensive transdiagnostic, longitudinal clinical cohort.  
33  
34 Therefore, the recruitment is based on presentation for care, and is not restricted by specific  
35  
36 diagnostic criteria. This diagnosis-independent recruitment is consistent with the National  
37  
38 Institute of Mental Health recommendations to conduct more inclusive clinical research in  
39  
40 cohorts drawn from similar standard service settings,<sup>33</sup> and facilitate translation of the  
41  
42 findings to other youth mental health care settings.  
43  
44  
45  
46  
47  
48  
49

### 50 ***Inclusion and exclusion criteria***

51  
52 Participation in this study will be offered to all young people between the ages of 12 and 30  
53  
54 years, presenting to participating youth mental health service sites. Young people who do not  
55  
56 have proficiency in the English language or have an intellectual disability (at investigator's  
57  
58  
59  
60

1  
2  
3 discretion) will be excluded due to inability to accurately complete study scales and  
4  
5 questionnaires.  
6  
7

## 8 9 Recruitment procedure

10  
11 All young people presenting to participating youth mental health services and meet inclusion  
12 and exclusion and exclusion criteria, will be invited to participate in this Youth Mental Health  
13  
14  
15  
16  
17 Tracker study.

## 18 19 20 21 22 Study course and procedures

23  
24 All participants recruited to this Youth Mental Health Tracker study will undergo a  
25  
26  
27 standardised baseline assessment ( $t_0$ , details see below), which will be conducted by a health  
28  
29  
30 professional at the service. Standard information on demographics, medical history, and  
31  
32  
33 physical history will be collected, and a range of clinician-administered assessments will be  
34  
35  
36 conducted. The young person will also complete a suite of online self-report questionnaires.  
37  
38  
39

40  
41 Participants that complete the baseline assessment will be followed up and invited to  
42  
43  
44 complete an online assessment that will consist of the self-report questionnaire pack  
45  
46  
47 (completed online at home). These follow up assessments will be done at three and six months  
48  
49  
50 following the baseline assessment ( $t_3$ ,  $t_6$ ).

51  
52  
53 To ensure optimal participant care is maintained, all participants will be invited to attend the  
54  
55  
56 service they initially presented to, for annual clinical routine assessments ( $t_{12}$ ,  $t_{24}$ ,  $t_{36}$ ). Clinician  
57  
58  
59 administered assessments and self-report questionnaires will be repeated to track individual  
60

1  
2  
3 outcomes. That is, young people will be tracked on at least an annual basis over 36 months  
4  
5 (Figure 1).  
6  
7  
8  
9

### 10 **Assessments**

11  
12 In order to provide improved characterisation and profiling of the Australian youth mental  
13 health population, multi-dimensional self-report and clinician-administered measures  
14  
15 (outlined below) will be deployed. These cover the five key domains of the multi-dimensional  
16  
17 assessment and outcomes framework.<sup>15, 20</sup>  
18  
19  
20  
21  
22  
23  
24

25 The self-report questionnaires (see Table 1) collect information regarding social and  
26 occupational function, self-harm, suicidal thoughts and behaviours (STB), alcohol or other  
27 substance misuse, physical health as well as lifetime and current psychiatric symptoms, family  
28 history of mental illness, and medical history. The questionnaires will be hosted online by  
29  
30 using the InnoWell Platform (InnoWell Pty Ltd).<sup>22</sup>  
31  
32  
33  
34  
35  
36  
37  
38  
39  
40  
41  
42  
43  
44  
45  
46  
47  
48  
49  
50  
51  
52  
53  
54  
55  
56  
57  
58  
59  
60

**Table 1: Overview of self-report questionnaires.**

| Health Domain                    | Psychometric tool                                                                                                                                                                                                                                                                                                                                                                                                                                                                                                                              |
|----------------------------------|------------------------------------------------------------------------------------------------------------------------------------------------------------------------------------------------------------------------------------------------------------------------------------------------------------------------------------------------------------------------------------------------------------------------------------------------------------------------------------------------------------------------------------------------|
| Distress                         | <ul style="list-style-type: none"> <li>Kessler Psychological Distress Scale (K10)<sup>34, 35</sup></li> </ul>                                                                                                                                                                                                                                                                                                                                                                                                                                  |
| Suicidal thoughts & behaviour    | <ul style="list-style-type: none"> <li>The Suicidal Ideation Attributes Scale (SIDAS)<sup>36</sup></li> <li>The Columbia–Suicide Severity Rating Scale (C-SSRS)<sup>37</sup></li> </ul>                                                                                                                                                                                                                                                                                                                                                        |
| Psychosis-like experiences       | <ul style="list-style-type: none"> <li>Prodromal Questionnaire (PQ-16)<sup>38</sup></li> </ul>                                                                                                                                                                                                                                                                                                                                                                                                                                                 |
| Mania-like experiences           | <ul style="list-style-type: none"> <li>Altman Self-Rating Mania Scale (ASRM)<sup>39</sup></li> </ul>                                                                                                                                                                                                                                                                                                                                                                                                                                           |
| Daily activities                 | <ul style="list-style-type: none"> <li>Youth not in education or employment (NEET), Organisation for Economic Co-operation and Development (OECD)</li> <li>Census of Population and Housing, Australian Bureau of Statistics (ABS)</li> <li>WHO Disability Assessment Schedule (WHODAS 2.0)<sup>40</sup> - 'unable to carry out usual activities' question</li> <li>Work and Social Adjustment Scale (WSAS)<sup>41</sup></li> <li>Social and Occupational Functioning Assessment Scale (SOFAS)<sup>42</sup>-adapted for self-report</li> </ul> |
| Self-harm                        | <ul style="list-style-type: none"> <li>Brief Non-suicidal Self-Injury Assessment Tool (B-NSSI-AT)<sup>43</sup></li> </ul>                                                                                                                                                                                                                                                                                                                                                                                                                      |
| Tobacco                          | <ul style="list-style-type: none"> <li>The Alcohol, Smoking and Substance Involvement Screening Test (ASSIST)<sup>44, 45</sup></li> </ul>                                                                                                                                                                                                                                                                                                                                                                                                      |
| Alcohol                          | <ul style="list-style-type: none"> <li>The Alcohol, Smoking and Substance Involvement Screening Test (ASSIST)<sup>44, 45</sup></li> <li>AUDIT alcohol consumption questions (AUDIT-C)<sup>46</sup></li> </ul>                                                                                                                                                                                                                                                                                                                                  |
| Relationships                    | <ul style="list-style-type: none"> <li>'Perceived social support' and 'conflict in close relationships' were measured by an adapted version of the Schuster's Social Support Scale (SSSS)<sup>47</sup></li> </ul>                                                                                                                                                                                                                                                                                                                              |
| Depression                       | <ul style="list-style-type: none"> <li>Quick Inventory of Depressive Symptomatology - self-report (QIDS-SR)<sup>48</sup></li> </ul>                                                                                                                                                                                                                                                                                                                                                                                                            |
| Anxiety                          | <ul style="list-style-type: none"> <li>Overall anxiety severity and impairment scale (OASIS)<sup>49</sup></li> </ul>                                                                                                                                                                                                                                                                                                                                                                                                                           |
| Physical health                  | <ul style="list-style-type: none"> <li>Height, weight, and waist circumference</li> <li>International physical activity questionnaire (IPAQ)<sup>50, 51</sup></li> </ul>                                                                                                                                                                                                                                                                                                                                                                       |
| Sleep-wake cycle                 | <ul style="list-style-type: none"> <li>Sleep timing items are based on the Pittsburgh Sleep Quality Index (PSQI)<sup>52</sup>, and Munich ChronoType Questionnaire (MCTQ)<sup>53, 54</sup></li> <li>Sleep quality items are based on expert consensus in the literature</li> </ul>                                                                                                                                                                                                                                                             |
| Post-traumatic stress            | <ul style="list-style-type: none"> <li>Primary Care PTSD Screen for DSM-5 (PC-PTSD-5)<sup>55</sup></li> </ul>                                                                                                                                                                                                                                                                                                                                                                                                                                  |
| Eating behaviours and body image | <ul style="list-style-type: none"> <li>Modelled on the Eating Disorder Examination (EDE)<sup>56</sup>. Derived from structured interview questions from the Health Omnibus Surveys</li> </ul>                                                                                                                                                                                                                                                                                                                                                  |
| Cannabis                         | <ul style="list-style-type: none"> <li>The Alcohol, Smoking and Substance Involvement Screening Test (ASSIST)<sup>44, 45</sup></li> </ul>                                                                                                                                                                                                                                                                                                                                                                                                      |

As part of the clinical routine assessments<sup>20</sup>, clinicians will record additional information regarding functioning, clinical stages, common illness subtypes, and possible underlying pathophysiological mechanisms. More precisely this includes:

1  
2  
3 (1) *Social and Occupational Assessment Scale (SOFAS)* reflecting the clinician's judgment of  
4 overall social and occupational function;  
5

6  
7  
8 (2) *Clinical Global Improvement (CGI)*, providing an overall clinician-rated summary measure  
9 that takes information on the patient's history, psychosocial circumstances, symptoms,  
10 behaviour, and the impact of the symptoms in the patient's ability to function into account;  
11  
12

13 (3) *common illness subtypes* (psychosis, anxious depression, bipolar spectrum) *and possible*  
14 *underlying pathophysiological mechanisms* (neurodevelopmental, hyperarousal, circadian)<sup>18,</sup>  
15  
16  
17  
18  
19  
20  
21  
22 <sup>31</sup>, and;

23 (4) *Clinical Staging*.<sup>18, 25, 29, 57</sup> Based on the clinical staging assessment<sup>18, 25, 29, 57</sup>, participants  
24 will be distinguished as those in the earliest phases with non-specific clinical presentations  
25 (stages 1a 'seeking help') from those at greater-risk with more specific, sub-threshold  
26 presentations (stage 1b) or experiencing first major illness episodes (stages 2+).  
27  
28  
29  
30  
31

32  
33  
34  
35 Following the continuation of this Youth Mental Health Tracker study, this may further include  
36 neuropsychological and neurobiological (genetic, metabolic, circadian, and imaging)  
37 assessments in a subset of participants as required by their clinicians based on need, to reflect  
38 an approach that is patient-centred care and highly personalised.  
39  
40  
41  
42  
43  
44  
45  
46  
47

## 48 Sample size calculation

49  
50  
51 The clinics that are participating in the project provide early intervention mental health  
52 services along with assistance in promoting young peoples' wellbeing. As such, there is no set  
53 sample size for the establishment of this cohort. Based on previous recruitment numbers of  
54 past research studies in these settings, the annual number of young people enrolled in the  
55 study is expected to be a minimum of 1000. This number will sufficiently detect even the  
56  
57  
58  
59  
60

1  
2  
3 smallest effect sizes to investigate prospectively, over three years, the course of multi-  
4 dimensional functional outcomes (social and occupational function; self-harm, suicidal  
5 thoughts and behaviours; alcohol or other substance misuse; physical health)<sup>15, 19</sup> in young  
6 people presenting to youth-specific mental health services.  
7  
8  
9  
10  
11  
12  
13  
14  
15

## 16 Data analysis plan

17  
18 This Youth Mental Health Tracker study will allow us to determine prospectively, over three  
19 years, the course of key multi-dimensional functional and clinical outcomes, in young people  
20 presenting to youth mental health services. This includes:  
21  
22  
23  
24  
25

- 26 1. Modelling the impacts of demographic, treatment and other key potentially  
27 modifiable moderator variables, on functional and clinical outcomes;  
28
- 29 2. Mapping the clinical illness trajectories and pathophysiological mechanisms of  
30 young people to determine transition rates to more severe illness forms (e.g.,  
31 severe depression, bipolar or psychotic disorder);  
32  
33
- 34 3. Investigating the differential effects of duration of exposure to antipsychotic,  
35 antidepressant, or mood-stabilising medications on physical health, clinical  
36 outcomes, and risks to self-harm or suicidal behaviour.  
37  
38  
39  
40  
41  
42  
43  
44  
45

46 We will make use of high-level statistical techniques including mixed-effects/ multilevel  
47 modelling, Bayesian modelling<sup>58-60</sup>, structural equation modelling<sup>61</sup>, and data-driven  
48 techniques<sup>62-64</sup> such as hierarchical cluster analysis<sup>65-67</sup>, latent profile analysis<sup>68</sup>, and group-  
49 based trajectory modelling.<sup>69</sup>  
50  
51  
52  
53  
54  
55  
56  
57  
58  
59  
60



## Ethics and dissemination

The study has been reviewed and approved by the Human Research Ethics Committee (HREC) of the Sydney Local Health District (SLHD, 2019/ETH00469, protocol version v1-2, 01/07/2019). Protocol modifications will only be implemented after HREC approval.

This is a research database study, therefore, consent process is entirely concerned with permissions regarding the storage and use of routinely collected data. For this reason, an opt-out consent process has been implemented. Potential participants presenting to the service at the participating sites will be in-depth informed by the clinicians about the study. The opt-out consent will be conducted at an *'arm's length approach'*. Participants will have sufficient time to consider whether they would like to participate in the research project. Young people under the age of 15 will initially undergo the standard consent process. However, the young participants who do not opt-out of the study will be required to obtain additional parent/guardian consent. Participants can withdraw from the study at any time. Participants will be assured that their decision to participate will not affect their treatment, nor the current or future relationship with their treating clinician or researchers at the service. All participant data will be de-identified and stored in accordance with applicable security standards; therefore, the privacy of all participants will be protected. Research findings will be disseminated through peer-reviewed journals and scientific conference presentations, and participant data will be non-identifiable.

## References

1. Whiteford HA, Degenhardt L, Rehm J, *et al.* Global burden of disease attributable to mental and substance use disorders: findings from the Global Burden of Disease Study 2010. *Lancet* 2013;**382**:1575-86
2. Erskine H, Moffitt TE, Copeland W, *et al.* A heavy burden on young minds: the global burden of mental and substance use disorders in children and youth. *Psychol Med* 2015;**45**:1551-63
3. Vigo D, Thornicroft G, Atun R. Estimating the true global burden of mental illness. *Lancet Psychiatry* 2016;**3**:171-8.doi:10.1016/S2215-0366(15)00505-2
4. Walker ER, McGee RE, Druss BG. Mortality in mental disorders and global disease burden implications: a systematic review and meta-analysis. *JAMA Psychiatry* 2015;**72**:334-41.doi:10.1001/jamapsychiatry.2014.2502
5. Gore FM, Bloem PJN, Patton GC, *et al.* Global burden of disease in young people aged 10–24 years: A systematic analysis. *Lancet* 2011;**377**:2093-102.doi:10.1016/s0140-6736(11)60512-6
6. Moran P, Coffey C, Romaniuk H, *et al.* The natural history of self-harm from adolescence to young adulthood: a population-based cohort study. *Lancet* 2012;**379**:236-43
7. Hawton K, Saunders KE, O'Connor RC. Self-harm and suicide in adolescents. *Lancet* 2012;**379**:2373-82
8. De Leo D, Heller TS. Who are the kids who self-harm? An Australian self-report school survey. *MJA* 2004;**181**:140-4

- 1  
2  
3 9. Scott EM, Hermens DF, Glozier N, *et al.* Targeted primary care-based mental health  
4 services for young Australians. *MJA* 2012;**196**:136-40  
5  
6  
7
- 8 10. Gustavsson A, Svensson M, Jacobi F, *et al.* Cost of disorders of the brain in Europe 2010.  
9  
10 *Eur Neuropsychopharmacol* 2011;**21**:718-79.doi:10.1016/j.euroneuro.2011.08.008  
11  
12
- 13 11. Stuart MJ, Baune BT. Depression and type 2 diabetes: inflammatory mechanisms of a  
14  
15 psychoneuroendocrine co-morbidity. *Neurosci Biobehav Rev* 2012;**36**:658-76  
16  
17
- 18 12. Scott EM, Carpenter JS, Iorfino F, *et al.* What is the prevalence, and what are the clinical  
19  
20 correlates, of insulin resistance in young people presenting for mental health care? A  
21  
22 cross-sectional study. *BMJ Open* 2019;**9**:e025674.doi:10.1136/bmjopen-2018-025674  
23  
24
- 25 13. Merikangas KR, Mehta RL, Molnar BE, *et al.* Comorbidity of substance use disorders  
26  
27 with mood and anxiety disorders: results of the International Consortium in Psychiatric  
28  
29 Epidemiology. *Addict Behav* 1998;**23**:893-907.doi:10.1016/s0306-4603(98)00076-8  
30  
31
- 32 14. Hermens DF, Scott EM, White D, *et al.* Frequent alcohol, nicotine or cannabis use is  
33  
34 common in young persons presenting for mental healthcare: a cross-sectional study.  
35  
36 *BMJ Open* 2013;**3**.doi:10.1136/bmjopen-2012-002229  
37  
38
- 39 15. Iorfino F, Carpenter JS, Cross SP, *et al.* Multidimensional outcomes in youth mental  
40  
41 health care: what matters and why? . *MJA* accepted.doi:10.5694/mja2.50383  
42  
43
- 44 16. Lopez AD, Mathers CD, Ezzati M, *et al.* Global and regional burden of disease and risk  
45  
46 factors, 2001: Systematic analysis of population health data. *Lancet* 2006;**367**:1747-  
47  
48 57.doi:10.1016/s0140-6736(06)68770-9  
49  
50
- 51 17. Rohleder C, Crouse JJ, Carpenter JS, *et al.* Personalising care options in youth mental  
52  
53 health: using multidimensional assessment, clinical stage, pathophysiological  
54  
55 mechanisms, and individual illness trajectories to guide treatment selection. . *MJA*  
56  
57 accepted.doi:10.5694/mja2.50383  
58  
59  
60

- 1  
2  
3 18. Carpenter JS, Iorfino F, Cross SP, *et al.* Combining clinical stage and pathophysiological  
4 mechanisms to understand illness trajectories in young people with emerging mood  
5 and psychotic syndromes. . *MJA* accepted.doi:10.5694/mja2.50383  
6  
7
- 8  
9  
10 19. Iorfino F, Hickie IB, Lee RS, *et al.* The underlying neurobiology of key functional domains  
11 in young people with mood and anxiety disorders: a systematic review. *BMC Psychiatry*  
12 2016;**16**:156.doi:10.1186/s12888-016-0852-3  
13  
14
- 15  
16  
17 20. Crouse JJ, Rohleder C, Carpenter JS, *et al.* A comprehensive assessment framework for  
18 youth mental health: guiding highly personalised and measurement-based care using  
19 multidimensional and objective measures. *MJA* accepted  
20  
21
- 22  
23  
24 21. Scott EM, Carpenter JS, Iorfino F, *et al.* Early intervention, prevention and prediction in  
25 mood disorders: Tracking multidimensional outcomes in young people presenting for  
26 mental health care. In: Baune BT, editor. *Personalized Psychiatry*: Elsevier; In press.  
27  
28
- 29  
30  
31 22. Iorfino F, Cross SP, Davenport T, *et al.* A Digital Platform Designed for Youth Mental  
32 Health Services to Deliver Personalized and Measurement-Based Care. *Front*  
33 *Psychiatry* 2019;**10**:595.doi:10.3389/fpsy.2019.00595  
34  
35
- 36  
37  
38 23. Sahakian BJ, Malloch G, Kennard C. A UK strategy for mental health and wellbeing.  
39 *Lancet* 2010;**375**:1854-5  
40  
41
- 42  
43  
44 24. Fergusson DM, Horwood J, Ridder EM, *et al.* Subthreshold Depression in Adolescence  
45 and Mental Health Outcomes in Adulthood. *Arch Gen Psychiatry* 2005;**62**:66-72  
46  
47
- 48  
49  
50 25. Hickie IB, Scott EM, Hermens DF, *et al.* Applying clinical staging to young people who  
51 present for mental health care. *Early Interv Psychiatry* 2013;**7**:31-43  
52  
53
- 54  
55  
56 26. Hickie IB, Scott J, Hermens DF, *et al.* Clinical classification in mental health at the cross-  
57 roads: which direction next? *BMC Med* 2013;**11**:125.doi:10.1186/1741-7015-11-125  
58  
59  
60

- 1  
2  
3 27. Patel V, Saxena S, Lund C, *et al.* The Lancet Commission on global mental health and  
4 sustainable development. *Lancet* 2018;**392**:1553-98.doi:10.1016/s0140-  
5  
6 6736(18)31612-x  
7  
8
- 9  
10 28. Scott J, Henry C. Clinical staging models: From general medicine to mental disorders.  
11  
12 *BJPsych Advances* 2017;**23**:292-9.doi:10.1192/apt.bp.116.016436  
13  
14
- 15 29. Hickie IB, Carpenter JS, Iorfino F, *et al.* The Utility of Clinical Staging in Youth Mental  
16 Health Settings: Neurobiological and Longitudinal data from Sydney-based studies of  
17 transdiagnostic cohorts. In: McGorry P, Hickie IB, editors. *Clinical Staging in Psychiatry:  
18 Making Diagnosis Work for Research and Treatment*: Cambridge University Press;  
19 2019.  
20  
21  
22
- 23 30. Insel T, Cuthbert B, Garvey M, *et al.* Research domain criteria (RDoC): toward a new  
24 classification framework for research on mental disorders. *Am J Psychiatry*  
25 2010;**167**:748-51.doi:10.1176/appi.ajp.2010.09091379  
26  
27  
28
- 29 31. Hickie IB, Hermens DF, Naismith SL, *et al.* Evaluating differential developmental  
30 trajectories to adolescent-onset mood and psychotic disorders. *BMC Psychiatry*  
31 2013;**13**:303.doi:10.1186/1471-244x-13-303  
32  
33  
34
- 35 32. Hickie IB, Davenport TA, Burns JM, *et al.* Project Synergy: co-designing technology-  
36 enabled solutions for Australian mental health services reform. *MJA* 2019;**211** Suppl  
37 7:S3-s39.doi:10.5694/mja2.50349  
38  
39  
40
- 41 33. Cuthbert BN. The RDoC framework: facilitating transition from ICD/DSM to  
42 dimensional approaches that integrate neuroscience and psychopathology. *World  
43 Psychiatry* 2014;**13**:28-35.doi:10.1002/wps.20087  
44  
45  
46  
47  
48  
49  
50  
51  
52  
53  
54  
55  
56  
57  
58  
59  
60

- 1
- 2
- 3 34. Kessler RC, Andrews G, Colpe LJ, *et al.* Short screening scales to monitor population
- 4 prevalences and trends in non-specific psychological distress. *Psychol Med*
- 5 2002;**32**:959-76
- 6
- 7
- 8
- 9
- 10 35. Andrews G, Slade T. Interpreting scores on the Kessler Psychological Distress Scale
- 11 (K10). *Aust N Z J Public Health* 2001;**25**:494-7
- 12
- 13
- 14
- 15 36. van Spijker BA, Batterham PJ, Calear AL, *et al.* The suicidal ideation attributes scale
- 16 (SIDAS): Community-based validation study of a new scale for the measurement of
- 17 suicidal ideation. *Suicide Life Threat Behav* 2014;**44**:408-19.doi:10.1111/sltb.12084
- 18
- 19
- 20
- 21
- 22 37. Posner K, Brown GK, Stanley B, *et al.* The Columbia-Suicide Severity Rating Scale: initial
- 23 validity and internal consistency findings from three multisite studies with adolescents
- 24 and adults. *Am J Psychiatry* 2011;**168**:1266-77.doi:10.1176/appi.ajp.2011.10111704
- 25
- 26
- 27
- 28
- 29
- 30 38. Ising HK, Veling W, Loewy RL, *et al.* The validity of the 16-item version of the Prodromal
- 31 Questionnaire (PQ-16) to screen for ultra high risk of developing psychosis in the
- 32 general help-seeking population. *Schizophr Bull* 2012;**38**:1288-
- 33 96.doi:10.1093/schbul/sbs068
- 34
- 35
- 36
- 37
- 38
- 39
- 40 39. Altman EG, Hedeker D, Peterson JL, *et al.* The Altman Self-Rating Mania Scale. *Biol*
- 41 *Psychiatry* 1997;**42**:948-55.doi:10.1016/s0006-3223(96)00548-3
- 42
- 43
- 44 40. Üstün TB, Kostanjsek N, Chatterji S, *et al.* Measuring health and disability: manual for
- 45 WHO Disability Assessment Schedule (WHODAS 2.0).
- 46 <https://apps.who.int/iris/handle/10665/43974> World Health Organization 2010 [
- 47
- 48
- 49
- 50
- 51
- 52 41. Mundt JC, Marks IM, Shear MK, *et al.* The Work and Social Adjustment Scale: a simple
- 53 measure of impairment in functioning. *Br J Psychiatry* 2002;**180**:461-4
- 54
- 55
- 56 42. Goldman HH, Skodol AE, Lave TR. Revising axis V for DSM-IV: a review of measures of
- 57 social functioning. *Am J Psychiatry* 1992;**149**:1148-56.doi:10.1176/ajp.149.9.1148
- 58
- 59
- 60

- 1  
2  
3 43. Whitlock J, Exner-Cortens D, Purington A. Assessment of nonsuicidal self-injury:  
4  
5 development and initial validation of the Non-Suicidal Self-Injury-Assessment Tool  
6  
7 (NSSI-AT). *Psychol Assess* 2014;**26**:935-46.doi:10.1037/a0036611  
8  
9
- 10 44. Humeniuk R, Ali R, Babor TF, *et al*. Validation of the Alcohol, Smoking And Substance  
11  
12 Involvement Screening Test (ASSIST). *Addiction* 2008;**103**:1039-47.doi:10.1111/j.1360-  
13  
14 0443.2007.02114.x  
15  
16
- 17 45. WHO ASSIST Working Group. The Alcohol, Smoking and Substance Involvement  
18  
19 Screening Test (ASSIST): development, reliability and feasibility. *Addiction*  
20  
21 2002;**97**:1183-94  
22  
23  
24
- 25 46. Bush K, Kivlahan DR, McDonell MB, *et al*. The AUDIT alcohol consumption questions  
26  
27 (AUDIT-C): an effective brief screening test for problem drinking. Ambulatory Care  
28  
29 Quality Improvement Project (ACQUIP). Alcohol Use Disorders Identification Test. *Arch*  
30  
31 *Intern Med* 1998;**158**:1789-95  
32  
33
- 34 47. Schuster TL, Kessler RC, Aseltine RH, Jr. Supportive interactions, negative interactions,  
35  
36 and depressed mood. *Am J Community Psychol* 1990;**18**:423-38  
37  
38
- 39 48. Rush AJ, Trivedi MH, Ibrahim HM, *et al*. The 16-Item Quick Inventory of Depressive  
40  
41 Symptomatology (QIDS), clinician rating (QIDS-C), and self-report (QIDS-SR): a  
42  
43 psychometric evaluation in patients with chronic major depression. *Biol Psychiatry*  
44  
45 2003;**54**:573-83  
46  
47  
48
- 49 49. Norman SB, Cissell SH, Means-Christensen AJ, *et al*. Development and validation of an  
50  
51 Overall Anxiety Severity And Impairment Scale (OASIS). *Depress Anxiety* 2006;**23**:245-  
52  
53 9.doi:10.1002/da.20182  
54  
55
- 56 50. Booth M. Assessment of physical activity: an international perspective. *Res Q Exerc*  
57  
58 *Sport* 2000;**71**:S114-20  
59  
60

- 1  
2  
3 51. Craig CL, Marshall AL, Sjostrom M, *et al.* International physical activity questionnaire:  
4  
5 12-country reliability and validity. *Med Sci Sports Exerc* 2003;**35**:1381-  
6  
7 95.doi:10.1249/01.MSS.0000078924.61453.FB  
8  
9
- 10 52. Buysse DJ, Reynolds CF, 3rd, Monk TH, *et al.* The Pittsburgh Sleep Quality Index: a new  
11  
12 instrument for psychiatric practice and research. *Psychiatry Res* 1989;**28**:193-213  
13  
14
- 15 53. Zavada A, Gordijn MC, Beersma DG, *et al.* Comparison of the Munich Chronotype  
16  
17 Questionnaire with the Horne-Ostberg's Morningness-Eveningness Score. *Chronobiol*  
18  
19 *Int* 2005;**22**:267-78  
20  
21
- 22 54. Roenneberg T, Wirz-Justice A, Mellow M. Life between clocks: daily temporal patterns  
23  
24 of human chronotypes. *J Biol Rhythms* 2003;**18**:80-  
25  
26 90.doi:10.1177/0748730402239679  
27  
28
- 29 55. Prins A, Bovin MJ, Smolenski DJ, *et al.* The Primary Care PTSD Screen for DSM-5 (PC-  
30  
31 PTSD-5): Development and Evaluation Within a Veteran Primary Care Sample. *J Gen*  
32  
33 *Intern Med* 2016;**31**:1206-11.doi:10.1007/s11606-016-3703-5  
34  
35
- 36 56. Fairburn CG, Cooper Z. The Eating Disorder Examination (12th edition). Binge eating:  
37  
38 Nature, assessment, and treatment. New York, NY, US: Guilford Press; 1993. p. 317-60.  
39  
40
- 41 57. Hickie IB, Scott J, McGorry PD. Clinical staging for mental disorders: a new  
42  
43 development in diagnostic practice in mental health. *MJA* 2013;**198**:461-2  
44  
45
- 46 58. Sojo VE, Wood RE, Wood SA, *et al.* Reporting requirements, targets, and quotas for  
47  
48 women in leadership. 2016;**27**:519 - 36.doi:10.1016/j.leaqua.2015.12.003  
49  
50
- 51 59. Lee RSC, Hermens DF, Scott J, *et al.* A transdiagnostic study of education, employment,  
52  
53 and training outcomes in young people with mental illness. *Psychol Med* 2017;**47**:2061-  
54  
55 70.doi:10.1017/s0033291717000484  
56  
57  
58  
59  
60



- 1  
2  
3 60. Iorfino F, Scott E, Carpenter JS, *et al.* Predictors of clinical stage transitions among  
4  
5 young people presenting to early intervention services with anxiety, mood, or  
6  
7 psychotic disorders. *JAMA Psychiatry* accepted  
8  
9  
10 61. Lee RSC, Hermens DF, Naismith SL, *et al.* Clinical, neurocognitive and demographic  
11  
12 factors associated with functional impairment in the Australian Brain and Mind Youth  
13  
14 Cohort Study (2008-2016). *BMJ Open* 2018;**8**:e022659.doi:10.1136/bmjopen-2018-  
15  
16 022659  
17  
18  
19 62. Lee RS, Hermens DF, Naismith SL, *et al.* Neuropsychological and functional outcomes  
20  
21 in recent-onset major depression, bipolar disorder and schizophrenia-spectrum  
22  
23 disorders: a longitudinal cohort study. *Transl Psychiatry*  
24  
25 2015;**5**:e555.doi:10.1038/tp.2015.50  
26  
27  
28  
29 63. Hermens DF, Lagopoulos J, Naismith SL, *et al.* Distinct neurometabolic profiles are  
30  
31 evident in the anterior cingulate of young people with major psychiatric disorders.  
32  
33 *Transl Psychiatry* 2012;**2**:e110.doi:10.1038/tp.2012.35  
34  
35  
36 64. Hermens DF, Naismith SL, Chitty KM, *et al.* Cluster analysis reveals abnormal  
37  
38 hippocampal neurometabolic profiles in young people with mood disorders. *Eur*  
39  
40 *Neuropsychopharmacol* 2015;**25**:836-45.doi:10.1016/j.euroneuro.2015.02.009  
41  
42  
43  
44 65. Tickell AM, Scott EM, Davenport T, *et al.* Developing neurocognitive standard clinical  
45  
46 care: A study of young adult inpatients. *Psychiatry Res* 2019;**276**:232-  
47  
48 8.doi:10.1016/j.psychres.2019.05.003  
49  
50  
51 66. Tickell AM, Scott EM, Davenport T, *et al.* Neurocognitive clusters: A pilot study of young  
52  
53 people with affective disorders in an inpatient facility. *J Affect Disord* 2019;**242**:80-  
54  
55 6.doi:10.1016/j.jad.2018.08.045  
56  
57  
58  
59  
60

- 1  
2  
3 67. Crouse JJ, Moustafa AA, Bogaty SER, *et al.* Parcellating cognitive heterogeneity in early  
4  
5 psychosis-spectrum illnesses: A cluster analysis. *Schizophr Res* 2018;**202**:91-  
6  
7 8.doi:10.1016/j.schres.2018.06.060  
8  
9  
10 68. Crouse JJ, Chitty KM, Iorfino F, *et al.* Exploring associations between early substance  
11  
12 use and longitudinal socio-occupational functioning in young people engaged in a  
13  
14 mental health service. *PLoS ONE*  
15  
16 2019;**14**:e0210877.doi:10.1371/journal.pone.0210877  
17  
18  
19 69. Iorfino F, Hermens DF, Shane P, *et al.* Delineating the trajectories of social and  
20  
21 occupational functioning of young people attending early intervention mental health  
22  
23 services in Australia: a longitudinal study. *BMJ open* 2018;**8**:e020678  
24  
25  
26  
27  
28  
29

## Contributors

30  
31  
32  
33 IBH conceived the research idea, designed the study, and is the principal investigator. CR and  
34  
35 YJCS contributed to study conception and wrote the study protocol with input of IBH, JJC, TAD,  
36  
37 FI, BH, NZ, AN, JSC, AMT, CW, SPC, AJG, DK, FML, EMS. CR wrote the manuscript with input of  
38  
39 IBH, YJCS, JJC, TAD, FI, BH, NZ, AN, JSC, and AMT. All authors critically reviewed content and  
40  
41 approved the final version of the publication.  
42  
43  
44  
45  
46  
47

## Funding

48  
49  
50  
51 This project is an investigator-initiated trial and will be supported by philanthropic funding.  
52  
53 IBH is supported by a National Health and Medical Research Council (NHMRC) Senior Principle  
54  
55 Research Fellowship grant number 1136259.  
56  
57  
58  
59  
60

## Competing interests

Project Synergy (2014–2016) was commissioned by the Department of Health and conducted by the Young and Well Cooperative Research Centre (Young and Well CRC) in partnership with the University of Sydney's Brain and Mind Centre. The Department of Health (Australian Government) has further supported Project Synergy through a significant investment over 3 years (2017–2020) which led to the development of InnoWell Pty Ltd, a joint venture between the University of Sydney and PricewaterhouseCoopers (Australia) (PwC). The University of Sydney and PwC (Australia) each have a 45% shareholding in InnoWell. The remaining 10% shareholding is evenly shared between Professor Jane Burns and Professor Ian Hickie.

## Legends

**Figure 1: Overview of study visits.** After completing the baseline visit, participants will be followed-up once yearly. During each visit, self-report questionnaires and clinical routine assessments have to be completed. In addition, participants will be asked to complete self-report questionnaires also 3 and 6 months after study start.

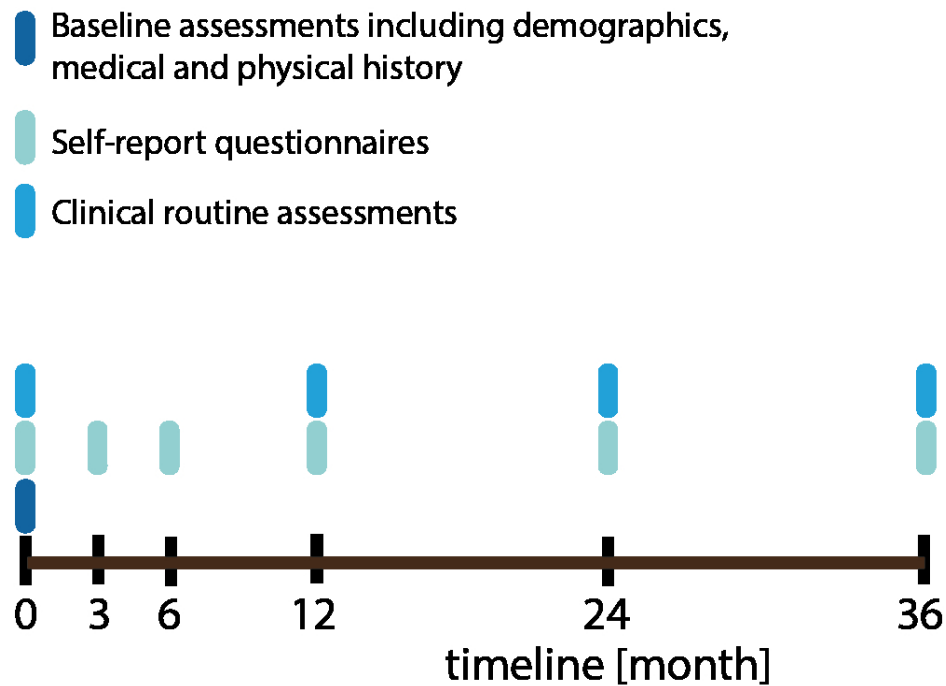

Overview of study visits. / After completing the baseline visit, participants will be followed-up once yearly. During each visit, self-report questionnaires and clinical routine assessments have to be completed. In addition, participants will be asked to complete self-report questionnaires also 3 and 6 months after study start.

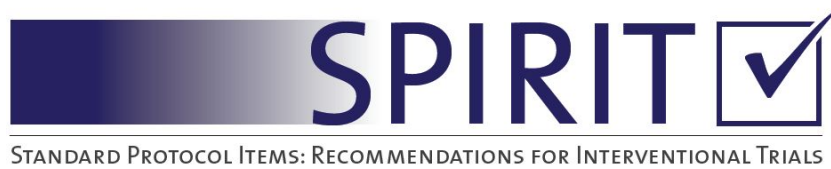

SPIRIT 2013 Checklist: Recommended items to address in a clinical trial protocol and related documents\*

| Section/item                      | Item No | Description                                                                                                                                                                                                                                                                              | Reported on page # |
|-----------------------------------|---------|------------------------------------------------------------------------------------------------------------------------------------------------------------------------------------------------------------------------------------------------------------------------------------------|--------------------|
| <b>Administrative information</b> |         |                                                                                                                                                                                                                                                                                          |                    |
| Title                             | 1       | Descriptive title identifying the study design, population, interventions, and, if applicable, trial acronym                                                                                                                                                                             | 1                  |
| Trial registration                | 2a      | Trial identifier and registry name. If not yet registered, name of intended registry                                                                                                                                                                                                     | NA                 |
|                                   | 2b      | All items from the World Health Organization Trial Registration Data Set                                                                                                                                                                                                                 | NA                 |
| Protocol version                  | 3       | Date and version identifier                                                                                                                                                                                                                                                              | 14                 |
| Funding                           | 4       | Sources and types of financial, material, and other support                                                                                                                                                                                                                              | 23                 |
| Roles and responsibilities        | 5a      | Names, affiliations, and roles of protocol contributors                                                                                                                                                                                                                                  | 1                  |
|                                   | 5b      | Name and contact information for the trial sponsor                                                                                                                                                                                                                                       | NA                 |
|                                   | 5c      | Role of study sponsor and funders, if any, in study design; collection, management, analysis, and interpretation of data; writing of the report; and the decision to submit the report for publication, including whether they will have ultimate authority over any of these activities | NA                 |
|                                   | 5d      | Composition, roles, and responsibilities of the coordinating centre, steering committee, endpoint adjudication committee, data management team, and other individuals or groups overseeing the trial, if applicable (see Item 21a for data monitoring committee)                         | NA                 |
| <b>Introduction</b>               |         |                                                                                                                                                                                                                                                                                          |                    |
| Background and rationale          | 6a      | Description of research question and justification for undertaking the trial, including summary of relevant studies (published and unpublished) examining benefits and harms for each intervention                                                                                       | 4-6                |
|                                   | 6b      | Explanation for choice of comparators                                                                                                                                                                                                                                                    | NA                 |
| Objectives                        | 7       | Specific objectives or hypotheses                                                                                                                                                                                                                                                        | 6-7                |

|    |                                                                     |     |                                                                                                                                                                                                                                                                                                                                                                                |                |
|----|---------------------------------------------------------------------|-----|--------------------------------------------------------------------------------------------------------------------------------------------------------------------------------------------------------------------------------------------------------------------------------------------------------------------------------------------------------------------------------|----------------|
| 1  |                                                                     |     |                                                                                                                                                                                                                                                                                                                                                                                |                |
| 2  | Trial design                                                        | 8   | Description of trial design including type of trial (eg, parallel group, crossover, factorial, single group), allocation ratio, and framework (eg, superiority, equivalence, noninferiority, exploratory)                                                                                                                                                                      | 7              |
| 3  |                                                                     |     |                                                                                                                                                                                                                                                                                                                                                                                |                |
| 4  |                                                                     |     |                                                                                                                                                                                                                                                                                                                                                                                |                |
| 5  |                                                                     |     |                                                                                                                                                                                                                                                                                                                                                                                |                |
| 6  |                                                                     |     |                                                                                                                                                                                                                                                                                                                                                                                |                |
| 7  |                                                                     |     |                                                                                                                                                                                                                                                                                                                                                                                |                |
| 8  | <b>Methods: Participants, interventions, and outcomes</b>           |     |                                                                                                                                                                                                                                                                                                                                                                                |                |
| 9  |                                                                     |     |                                                                                                                                                                                                                                                                                                                                                                                |                |
| 10 | Study setting                                                       | 9   | Description of study settings (eg, community clinic, academic hospital) and list of countries where data will be collected. Reference to where list of study sites can be obtained                                                                                                                                                                                             | 7              |
| 11 |                                                                     |     |                                                                                                                                                                                                                                                                                                                                                                                |                |
| 12 |                                                                     |     |                                                                                                                                                                                                                                                                                                                                                                                |                |
| 13 |                                                                     |     |                                                                                                                                                                                                                                                                                                                                                                                |                |
| 14 | Eligibility criteria                                                | 10  | Inclusion and exclusion criteria for participants. If applicable, eligibility criteria for study centres and individuals who will perform the interventions (eg, surgeons, psychotherapists)                                                                                                                                                                                   | 8-9            |
| 15 |                                                                     |     |                                                                                                                                                                                                                                                                                                                                                                                |                |
| 16 |                                                                     |     |                                                                                                                                                                                                                                                                                                                                                                                |                |
| 17 |                                                                     |     |                                                                                                                                                                                                                                                                                                                                                                                |                |
| 18 |                                                                     |     |                                                                                                                                                                                                                                                                                                                                                                                |                |
| 19 | Interventions                                                       | 11a | Interventions for each group with sufficient detail to allow replication, including how and when they will be administered                                                                                                                                                                                                                                                     | NA             |
| 20 |                                                                     |     |                                                                                                                                                                                                                                                                                                                                                                                |                |
| 21 |                                                                     |     |                                                                                                                                                                                                                                                                                                                                                                                |                |
| 22 |                                                                     | 11b | Criteria for discontinuing or modifying allocated interventions for a given trial participant (eg, drug dose change in response to harms, participant request, or improving/worsening disease)                                                                                                                                                                                 | NA             |
| 23 |                                                                     |     |                                                                                                                                                                                                                                                                                                                                                                                |                |
| 24 |                                                                     |     |                                                                                                                                                                                                                                                                                                                                                                                |                |
| 25 |                                                                     |     |                                                                                                                                                                                                                                                                                                                                                                                |                |
| 26 |                                                                     |     |                                                                                                                                                                                                                                                                                                                                                                                |                |
| 27 |                                                                     |     |                                                                                                                                                                                                                                                                                                                                                                                |                |
| 28 |                                                                     | 11c | Strategies to improve adherence to intervention protocols, and any procedures for monitoring adherence (eg, drug tablet return, laboratory tests)                                                                                                                                                                                                                              | NA             |
| 29 |                                                                     |     |                                                                                                                                                                                                                                                                                                                                                                                |                |
| 30 |                                                                     |     |                                                                                                                                                                                                                                                                                                                                                                                |                |
| 31 |                                                                     |     |                                                                                                                                                                                                                                                                                                                                                                                |                |
| 32 |                                                                     | 11d | Relevant concomitant care and interventions that are permitted or prohibited during the trial                                                                                                                                                                                                                                                                                  | NA             |
| 33 |                                                                     |     |                                                                                                                                                                                                                                                                                                                                                                                |                |
| 34 |                                                                     |     |                                                                                                                                                                                                                                                                                                                                                                                |                |
| 35 | Outcomes                                                            | 12  | Primary, secondary, and other outcomes, including the specific measurement variable (eg, systolic blood pressure), analysis metric (eg, change from baseline, final value, time to event), method of aggregation (eg, median, proportion), and time point for each outcome. Explanation of the clinical relevance of chosen efficacy and harm outcomes is strongly recommended | 13             |
| 36 |                                                                     |     |                                                                                                                                                                                                                                                                                                                                                                                |                |
| 37 |                                                                     |     |                                                                                                                                                                                                                                                                                                                                                                                |                |
| 38 |                                                                     |     |                                                                                                                                                                                                                                                                                                                                                                                |                |
| 39 |                                                                     |     |                                                                                                                                                                                                                                                                                                                                                                                |                |
| 40 |                                                                     |     |                                                                                                                                                                                                                                                                                                                                                                                |                |
| 41 |                                                                     |     |                                                                                                                                                                                                                                                                                                                                                                                |                |
| 42 |                                                                     |     |                                                                                                                                                                                                                                                                                                                                                                                |                |
| 43 |                                                                     |     |                                                                                                                                                                                                                                                                                                                                                                                |                |
| 44 |                                                                     |     |                                                                                                                                                                                                                                                                                                                                                                                |                |
| 45 | Participant timeline                                                | 13  | Time schedule of enrolment, interventions (including any run-ins and washouts), assessments, and visits for participants. A schematic diagram is highly recommended (see Figure)                                                                                                                                                                                               | Figure 1, 8-12 |
| 46 |                                                                     |     |                                                                                                                                                                                                                                                                                                                                                                                |                |
| 47 |                                                                     |     |                                                                                                                                                                                                                                                                                                                                                                                |                |
| 48 |                                                                     |     |                                                                                                                                                                                                                                                                                                                                                                                |                |
| 49 | Sample size                                                         | 14  | Estimated number of participants needed to achieve study objectives and how it was determined, including clinical and statistical assumptions supporting any sample size calculations                                                                                                                                                                                          | 12             |
| 50 |                                                                     |     |                                                                                                                                                                                                                                                                                                                                                                                |                |
| 51 |                                                                     |     |                                                                                                                                                                                                                                                                                                                                                                                |                |
| 52 |                                                                     |     |                                                                                                                                                                                                                                                                                                                                                                                |                |
| 53 |                                                                     |     |                                                                                                                                                                                                                                                                                                                                                                                |                |
| 54 |                                                                     |     |                                                                                                                                                                                                                                                                                                                                                                                |                |
| 55 | Recruitment                                                         | 15  | Strategies for achieving adequate participant enrolment to reach target sample size                                                                                                                                                                                                                                                                                            | 9              |
| 56 |                                                                     |     |                                                                                                                                                                                                                                                                                                                                                                                |                |
| 57 |                                                                     |     |                                                                                                                                                                                                                                                                                                                                                                                |                |
| 58 | <b>Methods: Assignment of interventions (for controlled trials)</b> |     |                                                                                                                                                                                                                                                                                                                                                                                | <b>NA</b>      |
| 59 |                                                                     |     |                                                                                                                                                                                                                                                                                                                                                                                |                |
| 60 |                                                                     |     |                                                                                                                                                                                                                                                                                                                                                                                |                |

## Allocation:

|                                  |     |                                                                                                                                                                                                                                                                                                                                                          |  |
|----------------------------------|-----|----------------------------------------------------------------------------------------------------------------------------------------------------------------------------------------------------------------------------------------------------------------------------------------------------------------------------------------------------------|--|
| Sequence generation              | 16a | Method of generating the allocation sequence (eg, computer-generated random numbers), and list of any factors for stratification. To reduce predictability of a random sequence, details of any planned restriction (eg, blocking) should be provided in a separate document that is unavailable to those who enrol participants or assign interventions |  |
| Allocation concealment mechanism | 16b | Mechanism of implementing the allocation sequence (eg, central telephone; sequentially numbered, opaque, sealed envelopes), describing any steps to conceal the sequence until interventions are assigned                                                                                                                                                |  |
| Implementation                   | 16c | Who will generate the allocation sequence, who will enrol participants, and who will assign participants to interventions                                                                                                                                                                                                                                |  |
| Blinding (masking)               | 17a | Who will be blinded after assignment to interventions (eg, trial participants, care providers, outcome assessors, data analysts), and how                                                                                                                                                                                                                |  |
|                                  | 17b | If blinded, circumstances under which unblinding is permissible, and procedure for revealing a participant's allocated intervention during the trial                                                                                                                                                                                                     |  |

**Methods: Data collection, management, and analysis**

|                         |     |                                                                                                                                                                                                                                                                                                                                                                                                              |       |
|-------------------------|-----|--------------------------------------------------------------------------------------------------------------------------------------------------------------------------------------------------------------------------------------------------------------------------------------------------------------------------------------------------------------------------------------------------------------|-------|
| Data collection methods | 18a | Plans for assessment and collection of outcome, baseline, and other trial data, including any related processes to promote data quality (eg, duplicate measurements, training of assessors) and a description of study instruments (eg, questionnaires, laboratory tests) along with their reliability and validity, if known. Reference to where data collection forms can be found, if not in the protocol | 10-12 |
|                         | 18b | Plans to promote participant retention and complete follow-up, including list of any outcome data to be collected for participants who discontinue or deviate from intervention protocols                                                                                                                                                                                                                    | 9     |
| Data management         | 19  | Plans for data entry, coding, security, and storage, including any related processes to promote data quality (eg, double data entry; range checks for data values). Reference to where details of data management procedures can be found, if not in the protocol                                                                                                                                            | 7     |
| Statistical methods     | 20a | Statistical methods for analysing primary and secondary outcomes. Reference to where other details of the statistical analysis plan can be found, if not in the protocol                                                                                                                                                                                                                                     | 13    |
|                         | 20b | Methods for any additional analyses (eg, subgroup and adjusted analyses)                                                                                                                                                                                                                                                                                                                                     | 13    |

|    |                                 |     |                                                                  |           |
|----|---------------------------------|-----|------------------------------------------------------------------|-----------|
| 1  |                                 |     |                                                                  |           |
| 2  |                                 | 20c | Definition of analysis population relating to protocol non-      |           |
| 3  |                                 |     | adherence (eg, as randomised analysis), and any statistical      | NA        |
| 4  |                                 |     | methods to handle missing data (eg, multiple imputation)         |           |
| 5  |                                 |     |                                                                  |           |
| 6  | <b>Methods: Monitoring</b>      |     |                                                                  | <b>NA</b> |
| 7  |                                 |     |                                                                  |           |
| 8  | Data monitoring                 | 21a | Composition of data monitoring committee (DMC); summary          |           |
| 9  |                                 |     | of its role and reporting structure; statement of whether it is  |           |
| 10 |                                 |     | independent from the sponsor and competing interests; and        |           |
| 11 |                                 |     | reference to where further details about its charter can be      |           |
| 12 |                                 |     | found, if not in the protocol. Alternatively, an explanation of  |           |
| 13 |                                 |     | why a DMC is not needed                                          |           |
| 14 |                                 |     |                                                                  |           |
| 15 |                                 |     |                                                                  |           |
| 16 |                                 | 21b | Description of any interim analyses and stopping guidelines,     |           |
| 17 |                                 |     | including who will have access to these interim results and      |           |
| 18 |                                 |     | make the final decision to terminate the trial                   |           |
| 19 |                                 |     |                                                                  |           |
| 20 |                                 |     |                                                                  |           |
| 21 | Harms                           | 22  | Plans for collecting, assessing, reporting, and managing         |           |
| 22 |                                 |     | solicited and spontaneously reported adverse events and          |           |
| 23 |                                 |     | other unintended effects of trial interventions or trial conduct |           |
| 24 |                                 |     |                                                                  |           |
| 25 | Auditing                        | 23  | Frequency and procedures for auditing trial conduct, if any,     |           |
| 26 |                                 |     | and whether the process will be independent from                 |           |
| 27 |                                 |     | investigators and the sponsor                                    |           |
| 28 |                                 |     |                                                                  |           |
| 29 |                                 |     |                                                                  |           |
| 30 | <b>Ethics and dissemination</b> |     |                                                                  |           |
| 31 |                                 |     |                                                                  |           |
| 32 | Research ethics                 | 24  | Plans for seeking research ethics committee/institutional        |           |
| 33 | approval                        |     | review board (REC/IRB) approval                                  | 14        |
| 34 |                                 |     |                                                                  |           |
| 35 | Protocol                        | 25  | Plans for communicating important protocol modifications (eg,    |           |
| 36 | amendments                      |     | changes to eligibility criteria, outcomes, analyses) to relevant |           |
| 37 |                                 |     | parties (eg, investigators, REC/IRBs, trial participants, trial  | 14        |
| 38 |                                 |     | registries, journals, regulators)                                |           |
| 39 |                                 |     |                                                                  |           |
| 40 |                                 |     |                                                                  |           |
| 41 | Consent or assent               | 26a | Who will obtain informed consent or assent from potential trial  |           |
| 42 |                                 |     | participants or authorised surrogates, and how (see Item 32)     | 14        |
| 43 |                                 |     |                                                                  |           |
| 44 |                                 | 26b | Additional consent provisions for collection and use of          |           |
| 45 |                                 |     | participant data and biological specimens in ancillary studies,  |           |
| 46 |                                 |     | if applicable                                                    | NA        |
| 47 |                                 |     |                                                                  |           |
| 48 |                                 |     |                                                                  |           |
| 49 | Confidentiality                 | 27  | How personal information about potential and enrolled            |           |
| 50 |                                 |     | participants will be collected, shared, and maintained in order  |           |
| 51 |                                 |     | to protect confidentiality before, during, and after the trial   | 14        |
| 52 |                                 |     |                                                                  |           |
| 53 | Declaration of                  | 28  | Financial and other competing interests for principal            |           |
| 54 | interests                       |     | investigators for the overall trial and each study site          | 24        |
| 55 |                                 |     |                                                                  |           |
| 56 | Access to data                  | 29  | Statement of who will have access to the final trial dataset,    |           |
| 57 |                                 |     | and disclosure of contractual agreements that limit such         |           |
| 58 |                                 |     | access for investigators                                         | NA        |
| 59 |                                 |     |                                                                  |           |
| 60 |                                 |     |                                                                  |           |



|    |                   |     |                                                                      |    |
|----|-------------------|-----|----------------------------------------------------------------------|----|
| 1  |                   |     |                                                                      |    |
| 2  | Ancillary and     | 30  | Provisions, if any, for ancillary and post-trial care, and for       | NA |
| 3  | post-trial care   |     | compensation to those who suffer harm from trial participation       |    |
| 4  |                   |     |                                                                      |    |
| 5  | Dissemination     | 31a | Plans for investigators and sponsor to communicate trial             |    |
| 6  | policy            |     | results to participants, healthcare professionals, the public,       | 14 |
| 7  |                   |     | and other relevant groups (eg, via publication, reporting in         |    |
| 8  |                   |     | results databases, or other data sharing arrangements),              |    |
| 9  |                   |     | including any publication restrictions                               |    |
| 10 |                   |     |                                                                      |    |
| 11 |                   | 31b | Authorship eligibility guidelines and any intended use of            | NA |
| 12 |                   |     | professional writers                                                 |    |
| 13 |                   |     |                                                                      |    |
| 14 |                   | 31c | Plans, if any, for granting public access to the full protocol,      | NA |
| 15 |                   |     | participant-level dataset, and statistical code                      |    |
| 16 |                   |     |                                                                      |    |
| 17 |                   |     |                                                                      |    |
| 18 |                   |     |                                                                      |    |
| 19 | <b>Appendices</b> |     |                                                                      |    |
| 20 |                   |     |                                                                      |    |
| 21 | Informed consent  | 32  | Model consent form and other related documentation given to          | NA |
| 22 | materials         |     | participants and authorised surrogates                               |    |
| 23 |                   |     |                                                                      |    |
| 24 | Biological        | 33  | Plans for collection, laboratory evaluation, and storage of          |    |
| 25 | specimens         |     | biological specimens for genetic or molecular analysis in the        | NA |
| 26 |                   |     | current trial and for future use in ancillary studies, if applicable |    |
| 27 |                   |     |                                                                      |    |

\*It is strongly recommended that this checklist be read in conjunction with the SPIRIT 2013 Explanation & Elaboration for important clarification on the items. Amendments to the protocol should be tracked and dated. The SPIRIT checklist is copyrighted by the SPIRIT Group under the Creative Commons "[Attribution-NonCommercial-NoDerivs 3.0 Unported](https://creativecommons.org/licenses/by-nc-nd/3.0/)" license.

# BMJ Open

## Youth Mental Health Tracker: Protocol to establish a longitudinal cohort and research database for young people attending Australian mental health services.

|                                 |                                                                                                                                                                                                                                                                                                                                                                                                                                                                                                                                                                                                                                                                                                                                                                                                                                                                                                                                                                                                                                                                                                                                                                                               |
|---------------------------------|-----------------------------------------------------------------------------------------------------------------------------------------------------------------------------------------------------------------------------------------------------------------------------------------------------------------------------------------------------------------------------------------------------------------------------------------------------------------------------------------------------------------------------------------------------------------------------------------------------------------------------------------------------------------------------------------------------------------------------------------------------------------------------------------------------------------------------------------------------------------------------------------------------------------------------------------------------------------------------------------------------------------------------------------------------------------------------------------------------------------------------------------------------------------------------------------------|
| Journal:                        | <i>BMJ Open</i>                                                                                                                                                                                                                                                                                                                                                                                                                                                                                                                                                                                                                                                                                                                                                                                                                                                                                                                                                                                                                                                                                                                                                                               |
| Manuscript ID                   | bmjopen-2019-035379.R1                                                                                                                                                                                                                                                                                                                                                                                                                                                                                                                                                                                                                                                                                                                                                                                                                                                                                                                                                                                                                                                                                                                                                                        |
| Article Type:                   | Protocol                                                                                                                                                                                                                                                                                                                                                                                                                                                                                                                                                                                                                                                                                                                                                                                                                                                                                                                                                                                                                                                                                                                                                                                      |
| Date Submitted by the Author:   | 12-Feb-2020                                                                                                                                                                                                                                                                                                                                                                                                                                                                                                                                                                                                                                                                                                                                                                                                                                                                                                                                                                                                                                                                                                                                                                                   |
| Complete List of Authors:       | Rohleder, Cathrin; The University of Sydney, Brain and Mind Centre<br>Song, Yun; The University of Sydney, Brain and Mind Centre<br>Crouse, Jacob; The University of Sydney, Brain and Mind Centre<br>Davenport, Tracey; The University of Sydney, Brain and Mind Centre<br>Iorfino, Frank; The University of Sydney, Brain and Mind Centre<br>Hamilton, Blake; The University of Sydney, Brain and Mind Centre<br>Zmicerevska, Natalia; The University of Sydney, Brain and Mind Centre<br>Nichles, Alissa; The University of Sydney, Brain and Mind Centre<br>Carpenter, Joanne; The University of Sydney, Brain and Mind Centre<br>Tickell, Ashleigh; The University of Sydney, Brain and Mind Centre<br>Wilson, Chloe; The University of Sydney, Brain and Mind Centre<br>Cross, Shane; The University of Sydney, Brain and Mind Centre<br>Guastella, Adam; The University of Sydney, Brain and Mind Centre<br>Koethe, Dagmar; The University of Sydney, Brain and Mind Centre<br>Leweke, F. Markus; The University of Sydney, Brain and Mind Centre<br>Scott, Elizabeth; The University of Sydney, Brain and Mind Centre<br>Hickie, Ian; The University of Sydney, Brain and Mind Centre |
| <b>Primary Subject Heading</b>: | Mental health                                                                                                                                                                                                                                                                                                                                                                                                                                                                                                                                                                                                                                                                                                                                                                                                                                                                                                                                                                                                                                                                                                                                                                                 |
| Secondary Subject Heading:      | Epidemiology                                                                                                                                                                                                                                                                                                                                                                                                                                                                                                                                                                                                                                                                                                                                                                                                                                                                                                                                                                                                                                                                                                                                                                                  |
| Keywords:                       | MENTAL HEALTH, Child & adolescent psychiatry < PSYCHIATRY, Anxiety disorders < PSYCHIATRY, Depression & mood disorders < PSYCHIATRY, Schizophrenia & psychotic disorders < PSYCHIATRY                                                                                                                                                                                                                                                                                                                                                                                                                                                                                                                                                                                                                                                                                                                                                                                                                                                                                                                                                                                                         |
|                                 |                                                                                                                                                                                                                                                                                                                                                                                                                                                                                                                                                                                                                                                                                                                                                                                                                                                                                                                                                                                                                                                                                                                                                                                               |

SCHOLARONE™  
Manuscripts



I, the Submitting Author has the right to grant and does grant on behalf of all authors of the Work (as defined in the below author licence), an exclusive licence and/or a non-exclusive licence for contributions from authors who are: i) UK Crown employees; ii) where BMJ has agreed a CC-BY licence shall apply, and/or iii) in accordance with the terms applicable for US Federal Government officers or employees acting as part of their official duties; on a worldwide, perpetual, irrevocable, royalty-free basis to BMJ Publishing Group Ltd ("BMJ") its licensees and where the relevant Journal is co-owned by BMJ to the co-owners of the Journal, to publish the Work in this journal and any other BMJ products and to exploit all rights, as set out in our [licence](#).

The Submitting Author accepts and understands that any supply made under these terms is made by BMJ to the Submitting Author unless you are acting as an employee on behalf of your employer or a postgraduate student of an affiliated institution which is paying any applicable article publishing charge ("APC") for Open Access articles. Where the Submitting Author wishes to make the Work available on an Open Access basis (and intends to pay the relevant APC), the terms of reuse of such Open Access shall be governed by a Creative Commons licence – details of these licences and which [Creative Commons](#) licence will apply to this Work are set out in our licence referred to above.

Other than as permitted in any relevant BMJ Author's Self Archiving Policies, I confirm this Work has not been accepted for publication elsewhere, is not being considered for publication elsewhere and does not duplicate material already published. I confirm all authors consent to publication of this Work and authorise the granting of this licence.

1  
2  
3 Youth Mental Health Tracker: Protocol to establish a longitudinal  
4  
5  
6 cohort and research database for young people attending Australian  
7  
8  
9 mental health services.  
10  
11  
12  
13  
14

15 Cathrin Rohleder<sup>1</sup>, Yun Ju Christine Song<sup>1</sup>, Jacob J Crouse<sup>1</sup>, Tracey A Davenport<sup>1</sup>, Frank Iorfino<sup>1</sup>,  
16  
17 Blake Hamilton<sup>1</sup>, Natalia Zmicerevska<sup>1</sup>, Alissa Nichles<sup>1</sup>, Joanne S Carpenter<sup>1</sup>, Ashleigh M  
18  
19 Tickell<sup>1</sup>, Chloe Wilson<sup>1</sup>, Shane P Cross<sup>1</sup>, Adam J Guastella<sup>1</sup>, Dagmar Koethe<sup>1</sup>, F. Markus  
20  
21 Leweke<sup>1</sup>, Elizabeth M Scott<sup>1,2</sup>, Ian B Hickie<sup>1</sup>  
22  
23  
24  
25  
26  
27

28 <sup>1</sup> Brain and Mind Centre, University of Sydney, Sydney, NSW, Australia.

29 <sup>2</sup> University of Notre Dame Australia, Sydney, NSW, Australia  
30  
31  
32  
33  
34

35 Corresponding author:

36 Cathrin Rohleder

37 Brain and Mind Centre, The University of Sydney

38  
39  
40 94 Mallett Street, Camperdown, Sydney 2006, NSW, Australia

41  
42  
43  
44 cathrin.rohleder@sydney.edu.au  
45  
46  
47  
48  
49

50 Word Count: 2,144 (without Abstract, Article Summary, References, Statements, and Legends)  
51  
52  
53

54 Key Words:

55  
56 Humans, Adolescent, Longitudinal Studies, Mental Health, Early Intervention, Secondary  
57  
58 Prevention  
59  
60

## Abstract

**Introduction** Mental disorders are a leading cause of long-term disability worldwide. Much of the burden of mental ill health is mediated by early onset, comorbidities with physical health conditions, and chronicity of the illnesses. This study aims to track the early period of mental disorders amongst young people presenting to Australian mental health services to facilitate: more streamlined transdiagnostic processes; highly personalised and measurement-based care; secondary prevention; and enhanced long-term outcomes.

**Methods and analysis** Recruitment to this large-scale, multi-site, prospective, transdiagnostic, longitudinal clinical cohort study (*Youth Mental Health Tracker*) will be offered to all young people between the ages of 12 and 30 years presenting to participating services with proficiency in English and no history of intellectual disability. Young people will be tracked over three years with standardised assessments at baseline and three, six, 12, 24, and 36 months. Assessments will include self-report and clinician-administered measures, covering five key domains including: (1) social and occupational function; (2) self-harm, suicidal thoughts and behaviour; (3) alcohol or other substance misuse; (4) physical health; and (5) illness type, clinical stage and trajectory. Data collection will be facilitated by the use of a health information technology. The data will be used to: (1) determine prospectively the course of multi-dimensional functional outcomes, based on the differential impact of demographics, medication, psychological interventions, and other key potentially modifiable moderator variables; and (2) map pathophysiological mechanisms and clinical illness trajectories to determine transition rates of young people to more severe illness forms.

**Ethics and dissemination** The study has been reviewed and approved by the Human Research Ethics Committee of the Sydney Local Health District (SLHD, 2019/ETH00469). All data will be

1  
2  
3 non-identifiable, and research findings will be disseminated through peer-reviewed journals  
4  
5 and scientific conference presentations.  
6  
7  
8  
9

## 10 Article Summary

11  
12  
13 Strengths and limitations of this study:

- 14  
15  
16 • This study focusses on presentation care, rather than diagnosis-based, recruitment to  
17  
18 establish a comprehensive and transdiagnostic longitudinal cohort and research  
19  
20 database of young people attending Australian mental health services.  
21  
22
- 23  
24 • We aim to track up to 5,000 young people (aged between 12 and 30 years) over a  
25  
26 three-year period.  
27
- 28  
29 • The use of our multi-dimensional outcomes framework enables comprehensive  
30  
31 assessment of young people as well as routine monitoring.  
32
- 33  
34 • The study does not yet include standardised objective measures such as biomarkers,  
35  
36 data on brain structure and function, and neuropsychological assessments.  
37
- 38  
39 • The study is part of a clinical trials framework evaluating the utility of our  
40  
41 multidimensional outcomes framework as well as our pathophysiological mechanism  
42  
43 and illness trajectory model.  
44  
45  
46  
47  
48  
49  
50  
51  
52  
53  
54  
55  
56  
57  
58  
59  
60

## Introduction

Mental disorders are a leading cause of premature death and persistent disability worldwide.<sup>1-4</sup>

<sup>4</sup> In those aged 10 to 24 years, neuropsychiatric disorders contribute more than any other cause to the global burden of disease.<sup>5</sup> In addition to the early age of onset of mental disorders, factors including their prevalence, chronicity, comorbidity with physical illness, risky alcohol or other substance use, and high suicide risk and self-harm behaviour significantly contribute to significant disability and premature mortality.<sup>6-15</sup> Consequently, earlier identification, personalised early interventions, secondary prevention, and enhanced long-term care in the early phases of these disorders are key priorities to reduce persistent disability and premature mortality.<sup>16-18</sup>

In order to better characterise the individual needs and enable highly personalised and measurement-based care, we have proposed the use of a multi-dimensional outcomes framework.<sup>15, 19-21</sup> This framework comprises five key domains, namely:

- social and occupational function;
- self-harm, suicidal thoughts, and behaviours;
- alcohol or other substance misuse;
- physical health; and
- illness type, clinical stage, and trajectory.

These domains can be assessed by using various freely accessible validated scales and standardised questionnaires<sup>20</sup>. New health information technologies (HIT), such as the InnoWell Platform (Project Synergy, InnoWell Pty Ltd)<sup>22</sup>, can facilitate the delivery of such comprehensive assessments, as they allow clinicians to implement time-efficient self-report

1  
2  
3 versions of the scales and questionnaires that can often be completed by consumers without  
4  
5 guidance.<sup>20</sup>  
6  
7  
8  
9

10 The assessment and identification of individual needs in each domain may prove to be  
11 particularly valuable, as it allows clinicians to develop highly personalised care options  
12 targeting specific factors associated with illness persistence and more significant disability  
13 across disorders (e.g. functional impairment, physical illnesses, risky alcohol or other  
14 substance use, and high suicide risk and self-harm behaviour).<sup>19, 23</sup>  
15  
16  
17  
18  
19  
20  
21  
22  
23  
24

25 Young people presenting to mental health services commonly experience a variety of  
26 symptoms that are often less specific (e.g. anxiety, high level of psychological distress, sleep  
27 problems, mood instability, variable psychosocial function) and not yet sufficiently severe to  
28 meet thresholds for assigning specific diagnostic categories. Thus, current syndrome-focused  
29 classification systems, and their matching clinical guidelines, often map poorly onto the earlier  
30 phases of mental illness.<sup>18, 24-28</sup> A transdiagnostic clinical staging model has been proposed as  
31 an adjunct to formal diagnosis in order to address this problem. The clinical staging model  
32 reflects the progression of mental disorders and is based on the staging concept used in  
33 general medicine, wherein more advanced stages are associated with a poorer prognosis and  
34 a need for more intensive interventions with a higher risk-to-benefit ratio.<sup>18, 29</sup>  
35  
36  
37  
38  
39  
40  
41  
42  
43  
44  
45  
46  
47  
48

49 A detailed description of the this transdiagnostic staging model is given in references<sup>18, 29</sup>. In  
50 brief, the staging model distinguishes five stages. Each stage is defined by a degree of  
51 functional impairment and persistence of symptoms. Importantly, clinical stages are not  
52 expected to coincide with traditional diagnostic categories. The stages cover early illness  
53 phases characterised by non-specific symptoms accompanied by mild to moderate functional  
54  
55  
56  
57  
58  
59  
60



1  
2  
3 impairment (stage 1a) or “attenuated syndromes” of severe mental disorders, with moderate  
4  
5 to severe functional impairments (stage 1b), as well as full-threshold syndromes with clear  
6  
7 and ongoing functional impairment (stage 2), and later stages including recurrent or persistent  
8  
9 illnesses with marked worsening in social, educational or occupational function due to  
10  
11 persistence or recurrence (stage 3) or severe, persistent and unremitting illnesses with clear  
12  
13 evidence of marked functional deterioration (stage 4). The staging model takes also  
14  
15 comorbidities into account. In stage 1b cases, syndromes may be mixed in terms of their  
16  
17 symptoms or complicated by alcohol and other substance misuse. After transition to stage 2,  
18  
19 the syndrome may remain mixed in terms of symptoms, and not necessarily matching a single  
20  
21 or discrete DSM-style disorder, or primary discrete syndromes may co-occur. The significant  
22  
23 comorbidity may also include alcohol or other substance misuse, abnormal eating behaviour  
24  
25 or other relevant psychological syndromes.  
26  
27  
28  
29  
30  
31  
32  
33  
34

35 General medicine also shows that an understanding of underlying pathophysiological  
36  
37 mechanisms is crucial for selecting optimal treatment. Identifying mood and psychotic  
38  
39 syndromes (including anxiety, depression, bipolar disorder, psychosis) based on  
40  
41 pathophysiology will allow clinicians to select treatment options targeting underlying causes  
42  
43 and, thus, eventually lead to improved clinical outcomes.<sup>30</sup>  
44  
45  
46

47 Based on the results of a cross-sectional study<sup>31</sup>, we have proposed three underlying  
48  
49 pathophysiological mechanisms (neurodevelopmental abnormalities, hyperarousal, circadian  
50  
51 dysfunction), which over time influence individual illness trajectories to three different illness  
52  
53 types, namely psychosis, anxious depression, and bipolar spectrum disorders, respectively.<sup>18</sup>  
54  
55

56  
57 <sup>31</sup> More precisely, the “neurodevelopmental-psychosis illness type” is characterised by  
58  
59 psychotic features and significant and persistent developmental difficulties, including  
60

1  
2  
3 cognitive impairments, learning difficulties, and autism spectrum disorder. This subtype is  
4  
5 based on evidence linking neurodevelopmental abnormalities with increased risk of  
6  
7 developing psychotic phenomena<sup>32-34</sup> and is in line with meta-structures proposed for the  
8  
9 redevelopment of diagnostic classification systems.<sup>35, 36</sup> The “hyperarousal-anxious  
10  
11 depression” illness subtype includes cases with childhood anxiety, heightened stress  
12  
13 sensitivity, and adolescent depressive syndromes. Also, cases without clear evidence for a  
14  
15 neurodevelopmental-psychosis or circadian-bipolar spectrum illness subtype, are allocated to  
16  
17 this subtype. It is consistent with models of neural fear circuitry, prolonged stress responses,  
18  
19 and glucocorticoid-dependent arousal in anxiety and unipolar mood disorders.<sup>37-40</sup> the  
20  
21 “circadian-bipolar spectrum” illness subtype is derived from models linking mood disorders  
22  
23 with circadian disturbances and dysregulated activation and energy, and is characterised by  
24  
25 disrupted sleep-wake behaviours and circadian rhythms, delayed sleep-waking timing and an  
26  
27 atypical or bipolar spectrum symptom profile.<sup>41-44</sup>

28  
29 Current research projects at BMC are investigating the validity and potential implementation  
30  
31 of this approach within mental health services.<sup>45, 46</sup>

32  
33 Importantly, there is a degree of overlap between the three pathways at all stages of illness.  
34  
35 Previously, we have shown in a similar cohort study that 27% of young people with emerging  
36  
37 mental disorders progress across stages and between pathways throughout care. This  
38  
39 included 13% progressing between pathways whilst developing more specific and severe  
40  
41 symptoms.<sup>18</sup> Continuous tracking of long-term outcomes will provide detailed information on  
42  
43 these individual trajectories and factors influencing them, and, most importantly, will allow  
44  
45 for early identification of changing needs that require adjustments of individual interventions.  
46  
47 Furthermore, the information on clinical illness trajectories of young people can be used to  
48  
49 determine transition rates to more severe illness forms (e.g. severe depression, bipolar or  
50  
51  
52  
53  
54  
55  
56  
57  
58  
59  
60

1  
2  
3 psychotic disorder) and may help to better understand which factors drive the progression of  
4  
5 illness.  
6  
7  
8

## 9 Objectives of the study and conceptual framework

10  
11 Mental disorders emerge early in life and evolve dynamically over time. The longitudinal  
12  
13 *'Youth Mental Health Tracker'* study aims to better understand the complex and variable  
14  
15 clinical course (trajectories and pathophysiological mechanisms) of mental disorders and their  
16  
17 impacts over time by tracking long-term multidimensional outcomes in a youth mental health  
18  
19 cohort.  
20  
21  
22

23  
24 Standardised multi-dimensional clinical information will be routinely and confidentially  
25  
26 collected across participating services. The study involves multiple longitudinal assessments  
27  
28 so that key illness outcomes (i.e., social and occupational function, self-harm, suicidal  
29  
30 thoughts and behaviour, alcohol or other substance misuse, physical health, and illness type,  
31  
32 clinical stage, and trajectory) can be measured and tracked over time. Importantly, this allows  
33  
34 for the detection of treatment non-responders at an early stage of illness; that is, before  
35  
36 extensive exposure to interventions and chronic manifestation of illness.  
37  
38  
39  
40

41  
42  
43 In summary, such standardised data collection will enable improved identification,  
44  
45 characterisation and profiling of mental disorders in young people; thus, enabling the  
46  
47 identification of new targets and mechanisms that can be translated into more streamlined  
48  
49 transdiagnostic processes, the development of the next generation of highly personalised  
50  
51 interventions, and health service strategies that greatly enhance care for young people.  
52  
53  
54  
55  
56  
57  
58  
59  
60

## Methods and analysis

### Study design and setting

This is a large-scale, multi-site, prospective, transdiagnostic, longitudinal clinical cohort study (*Youth Mental Health Tracker*), with the Brain and Mind Centre (including *headspace* Camperdown, and Early Intervention and High Intensity Services; public health organisation) at the University of Sydney (Sydney, Australia), being the lead site for this study. Further, St Vincent's Private Hospital (USpace) (private health organisation) will be another participating site in Sydney, Australia. Thus, this study involves both *specialist* (USpace) and *enhanced primary-care* (*headspace* Camperdown, and Early Intervention and High Intensity Services) youth mental health services.

For the collection and storage of routine clinical data across sites, a HIT system will facilitate the data extraction and use in a de-identified manner for research purposes.

The study is expected to start in late 2019. Participants will be tracked over three years with standardised assessments occurring at baseline and three, six, 12, 24, and 36 months.

### Patient and public involvement

The health information technology (HIT) system (InnoWell Platform (InnoWell Pty Ltd)<sup>22</sup> that will be used by sites participating in the study for self-report assessments was developed with patient and public involvement and has been approved as medical device by the Australian Register of Therapeutic Goods (ARTG ID: 315030).<sup>47</sup> Although young people were consulted

1  
2  
3 during the development of the technology used to measure relevant outcomes of the study,  
4  
5 they were not invited to comment on the study design.  
6  
7  
8  
9

## 10 11 Study Population

12  
13  
14 This study focusses on young people seeking treatment for emergent mood and psychotic  
15 syndromes and aims to establish a comprehensive transdiagnostic, longitudinal clinical cohort.  
16  
17 Therefore, the recruitment is based on presentation for care, and is not restricted by specific  
18 diagnostic criteria. That is, young people presenting with non-specific anxiety or depressive  
19 symptoms according to diagnostic criteria (stage 1a), attenuated syndromes (stage 1b) or full-  
20 threshold, major, and discrete syndromes (stage 2+) will be included.  
21  
22  
23  
24  
25  
26  
27

28  
29 This diagnosis-independent recruitment is consistent with the National Institute of Mental  
30 Health recommendations to conduct more inclusive clinical research in cohorts drawn from  
31 similar standard service settings,<sup>48</sup> and facilitate translation of the findings to other youth  
32 mental health care settings.  
33  
34  
35  
36  
37

38  
39 However, the vast majority who presents to the participating ambulatory-care clinical services  
40 have 'internalising' disorders (anxiety, depression, mood or psychotic disorders etc.), often  
41 associated with role impairment, comorbid substance misuse and suicidal thoughts and  
42 behaviours. The proportion of persons with major 'externalising' disorders as their primary  
43 difficulty is low.  
44  
45  
46  
47  
48  
49

### 50 51 ***Inclusion and exclusion criteria***

52  
53 Participation in this study will be offered to all young people, presenting to participating youth  
54 mental health service sites that provide mental health support to young people between the  
55 ages of 12 and 30 years. Young people who do not have proficiency in the English language or  
56 have an intellectual disability (at investigator's discretion, based on standard procedures at  
57  
58  
59  
60

1  
2  
3 each site) will be excluded due to inability to accurately complete study scales and  
4  
5 questionnaires.  
6  
7  
8  
9

## 10 11 Recruitment procedure

12  
13  
14 All young people presenting to participating youth mental health services and meet inclusion  
15 and exclusion and exclusion criteria, will be invited to participate in this Youth Mental Health  
16  
17 Tracker study.  
18  
19  
20  
21  
22  
23  
24

## 25 Study course and procedures

26  
27  
28 All participants recruited to this Youth Mental Health Tracker study will undergo a  
29 standardised baseline assessment ( $t_0$ , details see below), which will routinely be conducted by  
30 a mental health professional at the service. Standard information on demographics, medical  
31 history, and physical history will be collected, and a range of clinician-administered  
32 assessments will be conducted. The young person will also complete a suite of online self-  
33 report questionnaires.  
34  
35  
36  
37  
38  
39  
40  
41  
42  
43  
44

45 Participants that complete the baseline assessment will be followed up and invited to  
46 complete an online assessment that will consist of the self-report questionnaire pack  
47 (completed online at home). These follow up assessments will be done at three and six months  
48 following the baseline assessment ( $t_3$ ,  $t_6$ ).  
49  
50  
51  
52  
53  
54

55  
56  
57 To ensure optimal participant care is maintained, all participants will be invited to attend the  
58 service they initially presented to, for annual clinical routine assessments ( $t_{12}$ ,  $t_{24}$ ,  $t_{36}$ ). Clinician  
59  
60

administered assessments and self-report questionnaires will be repeated to track individual outcomes. That is, young people will be tracked on at least an annual basis over 36 months (Figure 1).

### Assessments

In order to provide improved characterisation and profiling of the Australian youth mental health population, multi-dimensional self-report and clinician-administered measures (outlined below) will be deployed. These cover the five key domains of the multi-dimensional assessment and outcomes framework.<sup>20, 49</sup>

The self-report questionnaires (see Table 1) collect information regarding social and occupational function, self-harm, suicidal thoughts and behaviours (STB), alcohol or other substance misuse, physical health as well as lifetime and current psychiatric symptoms, family history of mental illness, and medical history. The questionnaires will be hosted online by using the InnoWell Platform (InnoWell Pty Ltd).<sup>22</sup>

**Table 1: Overview of self-report questionnaires.**

| Health Domain                 | Psychometric tool                                                                                                                                                                                                                                                                                                                                                     |
|-------------------------------|-----------------------------------------------------------------------------------------------------------------------------------------------------------------------------------------------------------------------------------------------------------------------------------------------------------------------------------------------------------------------|
| Distress                      | <ul style="list-style-type: none"> <li>Kessler Psychological Distress Scale (K10)<sup>50, 51</sup></li> </ul>                                                                                                                                                                                                                                                         |
| Suicidal thoughts & behaviour | <ul style="list-style-type: none"> <li>The Suicidal Ideation Attributes Scale (SIDAS)<sup>52</sup></li> <li>The Columbia–Suicide Severity Rating Scale (C-SSRS)<sup>53</sup></li> </ul>                                                                                                                                                                               |
| Psychosis-like experiences    | <ul style="list-style-type: none"> <li>Prodromal Questionnaire (PQ-16)<sup>54</sup></li> </ul>                                                                                                                                                                                                                                                                        |
| Mania-like experiences        | <ul style="list-style-type: none"> <li>Altman Self-Rating Mania Scale (ASRM)<sup>55</sup></li> </ul>                                                                                                                                                                                                                                                                  |
| Daily activities              | <ul style="list-style-type: none"> <li>Youth not in education or employment (NEET), Organisation for Economic Co-operation and Development (OECD)</li> <li>Census of Population and Housing, Australian Bureau of Statistics (ABS)</li> <li>WHO Disability Assessment Schedule (WHODAS 2.0)<sup>56</sup> - 'unable to carry out usual activities' question</li> </ul> |

|                                  |                                                                                                                                                                                                                                                                                        |
|----------------------------------|----------------------------------------------------------------------------------------------------------------------------------------------------------------------------------------------------------------------------------------------------------------------------------------|
|                                  | <ul style="list-style-type: none"> <li>• Work and Social Adjustment Scale (WSAS)<sup>57</sup></li> <li>• Social and Occupational Functioning Assessment Scale (SOFAS)<sup>58</sup>-adapted for self-report</li> </ul>                                                                  |
| Self-harm                        | <ul style="list-style-type: none"> <li>• Brief Non-suicidal Self-Injury Assessment Tool (B-NSSI-AT)<sup>59</sup></li> </ul>                                                                                                                                                            |
| Tobacco                          | <ul style="list-style-type: none"> <li>• The Alcohol, Smoking and Substance Involvement Screening Test (ASSIST)<sup>60, 61</sup></li> </ul>                                                                                                                                            |
| Alcohol                          | <ul style="list-style-type: none"> <li>• The Alcohol, Smoking and Substance Involvement Screening Test (ASSIST)<sup>60, 61</sup></li> <li>• AUDIT alcohol consumption questions (AUDIT-C)<sup>62</sup></li> </ul>                                                                      |
| Relationships                    | <ul style="list-style-type: none"> <li>• 'Perceived social support' and 'conflict in close relationships' were measured by an adapted version of the Schuster's Social Support Scale (SSSS)<sup>63</sup></li> </ul>                                                                    |
| Depression                       | <ul style="list-style-type: none"> <li>• Quick Inventory of Depressive Symptomatology - self-report (QIDS-SR)<sup>64</sup></li> </ul>                                                                                                                                                  |
| Anxiety                          | <ul style="list-style-type: none"> <li>• Overall anxiety severity and impairment scale (OASIS)<sup>65</sup></li> </ul>                                                                                                                                                                 |
| Physical health                  | <ul style="list-style-type: none"> <li>• Height, weight, and waist circumference</li> <li>• International physical activity questionnaire (IPAQ)<sup>66, 67</sup></li> </ul>                                                                                                           |
| Sleep-wake cycle                 | <ul style="list-style-type: none"> <li>• Sleep timing items are based on the Pittsburgh Sleep Quality Index (PSQI)<sup>68</sup>, and Munich ChronoType Questionnaire (MCTQ)<sup>69, 70</sup></li> <li>• Sleep quality items are based on expert consensus in the literature</li> </ul> |
| Post-traumatic stress            | <ul style="list-style-type: none"> <li>• Primary Care PTSD Screen for DSM-5 (PC-PTSD-5)<sup>71</sup></li> </ul>                                                                                                                                                                        |
| Eating behaviours and body image | <ul style="list-style-type: none"> <li>• Modelled on the Eating Disorder Examination (EDE)<sup>72</sup>. Derived from structured interview questions from the Health Omnibus Surveys</li> </ul>                                                                                        |
| Cannabis                         | <ul style="list-style-type: none"> <li>• The Alcohol, Smoking and Substance Involvement Screening Test (ASSIST)<sup>60, 61</sup></li> </ul>                                                                                                                                            |

As part of the clinical routine assessments<sup>20</sup>, clinicians will record additional information regarding functioning, clinical stages, common illness subtypes, and possible underlying pathophysiological mechanisms. More precisely this includes:

(1) *Social and Occupational Assessment Scale (SOFAS)* reflecting the clinician's judgment of overall social and occupational function;

(2) *Clinical Global Improvement (CGI)*, providing an overall clinician-rated summary measure that takes information on the patient's history, psychosocial circumstances, symptoms, behaviour, and the impact of the symptoms in the patient's ability to function into account;

(3) *common illness subtypes (psychosis, anxious depression, bipolar spectrum) and possible underlying pathophysiological mechanisms (neurodevelopmental, hyperarousal, circadian)*<sup>18</sup>,



1  
2  
3 <sup>31</sup>, and;  
4

5 (4) *Clinical Staging*.<sup>18, 25, 29, 73</sup> Based on the clinical staging assessment<sup>18, 25, 29, 73</sup>, participants  
6  
7  
8 will be distinguished as those in the earliest phases with non-specific clinical presentations  
9  
10 (stages 1a 'seeking help') from those at greater-risk with more specific, sub-threshold  
11  
12 presentations (stage 1b) or experiencing first major illness episodes (stages 2+).

13  
14  
15 Following the continuation of this Youth Mental Health Tracker study, this may further include  
16  
17 neuropsychological and neurobiological (genetic, metabolic, circadian, and imaging)  
18  
19 assessments in a subset of participants as required by their clinicians based on need, to reflect  
20  
21 an approach that is patient-centred care and highly personalised.  
22  
23  
24  
25  
26  
27

## 28 29 Sample size calculation

30  
31 The clinics that are participating in the project provide early intervention mental health  
32  
33 services along with assistance in promoting young peoples' wellbeing. As such, there is no set  
34  
35 sample size for the establishment of this cohort. Based on previous recruitment numbers of  
36  
37 past research studies in these settings, the annual number of young people enrolled in the  
38  
39 study is expected to be a minimum of 1000. This number will sufficiently detect even the  
40  
41 smallest effect sizes to investigate prospectively, over three years, the course of multi-  
42  
43 dimensional functional outcomes (social and occupational function; self-harm, suicidal  
44  
45 thoughts and behaviours; alcohol or other substance misuse; physical health)<sup>15, 19</sup> in young  
46  
47  
48  
49  
50  
51 people presenting to youth-specific mental health services.  
52  
53  
54  
55  
56

## 57 Data analysis plan

58  
59 This Youth Mental Health Tracker study will allow us to determine prospectively, over three  
60

years, the course of key multi-dimensional functional and clinical outcomes, in young people presenting to youth mental health services. This includes:

1. Modelling the impacts of demographic, treatment and other key potentially modifiable moderator variables, on functional and clinical outcomes;
2. Mapping the clinical illness trajectories and pathophysiological mechanisms of young people to determine transition rates to more severe illness forms (e.g., severe depression, bipolar or psychotic disorder);
3. Investigating the differential effects of duration of exposure to antipsychotic, antidepressant, or mood-stabilising medications on physical health, clinical outcomes, and risks to self-harm or suicidal behaviour.

We will make use of high-level statistical techniques including mixed-effects/ multilevel modelling, Bayesian modelling<sup>74-76</sup>, structural equation modelling<sup>77</sup>, and data-driven techniques<sup>78-80</sup> such as hierarchical cluster analysis<sup>81-83</sup>, latent profile analysis<sup>84</sup>, and group-based trajectory modelling.<sup>85</sup>

## Ethics and dissemination

The study has been reviewed and approved by the Human Research Ethics Committee (HREC) of the Sydney Local Health District (SLHD, 2019/ETH00469, protocol version v1-2, 01/07/2019). Protocol modifications will only be implemented after HREC approval.

This is a research database study, therefore, consent process is entirely concerned with permissions regarding the storage and use of routinely collected data. For this reason, an opt-out consent process has been implemented. Potential participants presenting to the service

1  
2  
3 at the participating sites will be in-depth informed by the clinicians about the study. The opt-  
4  
5 out consent will be conducted at an 'arm's length approach'. Participants will have sufficient  
6  
7 time to consider whether they would like to participate in the research project. Young people  
8  
9 under the age of 15 will initially undergo the standard consent process. However, the young  
10  
11 participants who do not opt-out of the study will be required to obtain additional  
12  
13 parent/guardian consent. Participants can withdraw from the study at any time. Participants  
14  
15 will be assured that their decision to participate will not affect their treatment, nor the current  
16  
17 or future relationship with their treating clinician or researchers at the service. All participant  
18  
19 data will be de-identified and stored in accordance with applicable security standards;  
20  
21 therefore, the privacy of all participants will be protected.  
22  
23  
24  
25  
26

27 Research findings will be disseminated through peer-reviewed journals and scientific  
28  
29 conference presentations, and participant data will be non-identifiable.  
30  
31

32 This study allows to build a large transdiagnostic clinical cohort. The data can be used to model  
33  
34 the clinical course and long-term functional outcomes of young people who present for clinical  
35  
36 care before extensive exposure to interventions or chronic illness course. The study aims to  
37  
38 improve identification, characterisation, and profiling of adolescent-onset mental disorders to  
39  
40 enhance personalised interventions, and health service strategies that greatly enhance care  
41  
42 for young people.  
43  
44  
45  
46  
47  
48  
49

## 50 References

- 51  
52  
53 1. Whiteford HA, Degenhardt L, Rehm J, *et al.* Global burden of disease attributable to  
54  
55 mental and substance use disorders: findings from the Global Burden of Disease Study 2010.  
56  
57 *Lancet* 2013;**382**:1575-86  
58  
59  
60

- 1  
2  
3 2. Erskine H, Moffitt TE, Copeland W, *et al.* A heavy burden on young minds: the global  
4 burden of mental and substance use disorders in children and youth. *Psychol Med*  
5  
6 2015;**45**:1551-63  
7
- 8  
9  
10 3. Vigo D, Thornicroft G, Atun R. Estimating the true global burden of mental illness.  
11  
12 *Lancet Psychiatry* 2016;**3**:171-8.doi:10.1016/S2215-0366(15)00505-2  
13
- 14  
15 4. Walker ER, McGee RE, Druss BG. Mortality in mental disorders and global disease  
16 burden implications: a systematic review and meta-analysis. *JAMA Psychiatry* 2015;**72**:334-  
17  
18 41.doi:10.1001/jamapsychiatry.2014.2502  
19
- 20  
21 5. Gore FM, Bloem PJN, Patton GC, *et al.* Global burden of disease in young people aged  
22  
23 10–24 years: A systematic analysis. *Lancet* 2011;**377**:2093-102.doi:10.1016/s0140-  
24  
25 6736(11)60512-6  
26  
27
- 28  
29 6. Moran P, Coffey C, Romaniuk H, *et al.* The natural history of self-harm from  
30 adolescence to young adulthood: a population-based cohort study. *Lancet* 2012;**379**:236-43  
31  
32
- 33  
34 7. Hawton K, Saunders KE, O'Connor RC. Self-harm and suicide in adolescents. *Lancet*  
35  
36 2012;**379**:2373-82  
37
- 38  
39 8. De Leo D, Heller TS. Who are the kids who self-harm? An Australian self-report school  
40 survey. *MJA* 2004;**181**:140-4  
41  
42
- 43  
44 9. Scott EM, Hermens DF, Glozier N, *et al.* Targeted primary care-based mental health  
45 services for young Australians. *Med J Aust* 2012;**196**:136-40  
46  
47
- 48  
49 10. Gustavsson A, Svensson M, Jacobi F, *et al.* Cost of disorders of the brain in Europe 2010.  
50  
51 *Eur Neuropsychopharmacol* 2011;**21**:718-79.doi:10.1016/j.euroneuro.2011.08.008  
52
- 53  
54 11. Stuart MJ, Baune BT. Depression and type 2 diabetes: inflammatory mechanisms of a  
55  
56 psychoneuroendocrine co-morbidity. *Neurosci Biobehav Rev* 2012;**36**:658-76  
57  
58  
59  
60

- 1  
2  
3 12. Scott EM, Carpenter JS, Iorfino F, *et al.* What is the prevalence, and what are the clinical  
4 correlates, of insulin resistance in young people presenting for mental health care? A cross-  
5 sectional study. *BMJ Open* 2019;**9**:e025674.doi:10.1136/bmjopen-2018-025674  
6  
7  
8  
9  
10 13. Merikangas KR, Mehta RL, Molnar BE, *et al.* Comorbidity of substance use disorders  
11 with mood and anxiety disorders: results of the International Consortium in Psychiatric  
12 Epidemiology. *Addict Behav* 1998;**23**:893-907.doi:10.1016/s0306-4603(98)00076-8  
13  
14  
15  
16  
17 14. Hermens DF, Scott EM, White D, *et al.* Frequent alcohol, nicotine or cannabis use is  
18 common in young persons presenting for mental healthcare: a cross-sectional study. *BMJ*  
19  
20  
21  
22  
23  
24  
25 15. Iorfino F, Carpenter JS, Cross SP, *et al.* Multidimensional outcomes in youth mental  
26 health care: what matters and why? *MJA* 2019;**211**:S4-S11  
27  
28  
29  
30 16. Lopez AD, Mathers CD, Ezzati M, *et al.* Global and regional burden of disease and risk  
31 factors, 2001: Systematic analysis of population health data. *Lancet* 2006;**367**:1747-  
32  
33  
34  
35  
36  
37  
38 17. Rohleder C, Crouse JJ, Carpenter JS, *et al.* Personalising care options in youth mental  
39 health: using multidimensional assessment, clinical stage, pathophysiological mechanisms,  
40 and individual illness trajectories to guide treatment selection. *MJA* 2019;**211**:S32-  
41  
42  
43  
44  
45  
46  
47  
48  
49  
50  
51  
52  
53  
54 18. Carpenter JS, Iorfino F, Cross SP, *et al.* Combining clinical stage and pathophysiological  
55 mechanisms to understand illness trajectories in young people with emerging mood and  
56  
57  
58  
59  
60  
60 19. Iorfino F, Hickie IB, Lee RS, *et al.* The underlying neurobiology of key functional domains  
in young people with mood and anxiety disorders: a systematic review. *BMC Psychiatry*  
2016;**16**:156.doi:10.1186/s12888-016-0852-3

- 1  
2  
3 20. Crouse JJ, Rohleder C, Carpenter JS, *et al.* A comprehensive assessment framework for  
4 youth mental health: guiding highly personalised and measurement-based care using  
5 multidimensional and objective measures. *MJA* 2019;**211**:S23-S31.doi:10.5694/mja2.50383  
6  
7
- 8  
9  
10 21. Scott EM, Carpenter JS, Iorfino F, *et al.* Early intervention, prevention and prediction in  
11 mood disorders: Tracking multidimensional outcomes in young people presenting for mental  
12 health care. In: Baune BT, editor. *Personalized Psychiatry*: Elsevier; 2019.  
13  
14
- 15  
16 22. Iorfino F, Cross SP, Davenport T, *et al.* A Digital Platform Designed for Youth Mental  
17 Health Services to Deliver Personalized and Measurement-Based Care. *Front Psychiatry*  
18 2019;**10**:595.doi:10.3389/fpsyt.2019.00595  
19  
20
- 21  
22 23. Sahakian BJ, Malloch G, Kennard C. A UK strategy for mental health and wellbeing. *The*  
23 *Lancet* 2010;**375**:1854-5  
24  
25
- 26  
27 24. Fergusson DM, Horwood J, Ridder EM, *et al.* Subthreshold Depression in Adolescence  
28 and Mental Health Outcomes in Adulthood. *Arch Gen Psychiatry* 2005;**62**:66-72  
29  
30
- 31  
32 25. Hickie IB, Scott EM, Hermens DF, *et al.* Applying clinical staging to young people who  
33 present for mental health care. *Early Interv Psychiatry* 2013;**7**:31-43  
34  
35
- 36  
37 26. Hickie IB, Scott J, Hermens DF, *et al.* Clinical classification in mental health at the cross-  
38 roads: which direction next? *BMC Med* 2013;**11**:125.doi:10.1186/1741-7015-11-125  
39  
40
- 41  
42 27. Patel V, Saxena S, Lund C, *et al.* The Lancet Commission on global mental health and  
43 sustainable development. *Lancet* 2018;**392**:1553-98.doi:10.1016/s0140-6736(18)31612-x  
44  
45
- 46  
47 28. Scott J, Henry C. Clinical staging models: From general medicine to mental disorders.  
48 *BJPsych Advances* 2017;**23**:292-9.doi:10.1192/apt.bp.116.016436  
49  
50
- 51  
52 29. Hickie IB, Carpenter JS, Iorfino F, *et al.* The Utility of Clinical Staging in Youth Mental  
53 Health Settings: Neurobiological and Longitudinal data from Sydney-based studies of  
54  
55  
56  
57  
58  
59  
60

transdiagnostic cohorts. In: McGorry P, Hickie IB, editors. *Clinical Staging in Psychiatry: Making Diagnosis Work for Research and Treatment*: Cambridge University Press; 2019.

30. Insel T, Cuthbert B, Garvey M, *et al*. Research domain criteria (RDoC): toward a new classification framework for research on mental disorders. *Am J Psychiatry* 2010;**167**:748-51.doi:10.1176/appi.ajp.2010.09091379

31. Hickie IB, Hermens DF, Naismith SL, *et al*. Evaluating differential developmental trajectories to adolescent-onset mood and psychotic disorders. *BMC Psychiatry* 2013;**13**:303.doi:10.1186/1471-244x-13-303

32. Bombin I, Mayoral M, Castro-Fornieles J, *et al*. Neuropsychological evidence for abnormal neurodevelopment associated with early-onset psychoses. *Psychol Med* 2013;**43**:757-68.doi:10.1017/S0033291712001535

33. Peralta V, de Jalón EG, Campos MS, *et al*. The meaning of childhood attention-deficit hyperactivity symptoms in patients with a first-episode of schizophrenia-spectrum psychosis. *Schizophr Res* 2011;**126**:28-35.doi:10.1016/j.schres.2010.09.010

34. Piper M, Beneyto M, Burne THJ, *et al*. The neurodevelopmental hypothesis of schizophrenia: convergent clues from epidemiology and neuropathology. *Psychiatr Clin North Am* 2012;**35**:571-84.doi:10.1016/j.psc.2012.06.002

35. Andrews G, Pine DS, Hobbs MJ, *et al*. Neurodevelopmental disorders: cluster 2 of the proposed meta-structure for DSM-V and ICD-11. *Psychol Med* 2009;**39**:2013-23.doi:10.1017/S0033291709990274

36. Andrews G, Goldberg DP, Krueger RF, *et al*. Exploring the feasibility of a meta-structure for DSM-V and ICD-11: could it improve utility and validity? *Psychol Med* 2009;**39**:1993-2000.doi:10.1017/S0033291709990250

- 1  
2  
3 37. Hansell NK, Wright MJ, Medland SE, *et al.* Genetic co-morbidity between neuroticism,  
4 anxiety/depression and somatic distress in a population sample of adolescent and young adult  
5 twins. *Psychol Med* 2012;**42**:1249-60.doi:10.1017/S0033291711002431  
6  
7  
8  
9  
10 38. Bennett A O MR. Stress and anxiety in schizophrenia and depression: glucocorticoids,  
11 corticotropin-releasing hormone and synapse regression. *Aust NZ J Psychiatry* 2008;**42**:995-  
12 1002.doi:10.1080/00048670802512073  
13  
14  
15  
16  
17 39. Charney DS. Psychobiological mechanisms of resilience and vulnerability: implications  
18 for successful adaptation to extreme stress. *Am J Psychiatry* 2004;**161**:195-  
19 216.doi:10.1176/appi.ajp.161.2.195  
20  
21  
22  
23  
24 40. McGowan PO, Sasaki A, D'Alessio AC, *et al.* Epigenetic regulation of the glucocorticoid  
25 receptor in human brain associates with childhood abuse. *Nat Neurosci* 2009;**12**:342-  
26 8.doi:10.1038/nn.2270  
27  
28  
29  
30  
31  
32 41. Woo YS, Shim IH, Wang H-R, *et al.* A diagnosis of bipolar spectrum disorder predicts  
33 diagnostic conversion from unipolar depression to bipolar disorder: a 5-year retrospective  
34 study. *J Affect Disord* 2015;**174**:83-8.doi:10.1016/j.jad.2014.11.034  
35  
36  
37  
38  
39 42. Scott J, Murray G, Henry C, *et al.* Activation in Bipolar Disorders: A Systematic Review.  
40 *JAMA Psychiatry* 2017;**74**:189-96.doi:10.1001/jamapsychiatry.2016.3459  
41  
42  
43  
44 43. Mitchell PB, Goodwin GM, Johnson GF, *et al.* Diagnostic guidelines for bipolar  
45 depression: a probabilistic approach. *Bipolar Disord* 2008;**10**:144-52.doi:10.1111/j.1399-  
46 5618.2007.00559.x  
47  
48  
49  
50  
51 44. Akiskal HS, Benazzi F. Atypical depression: a variant of bipolar II or a bridge between  
52 unipolar and bipolar II? *J Affect Disord* 2005;**84**:209-17.doi:10.1016/j.jad.2004.05.004  
53  
54  
55  
56 45. Davenport TA, LaMonica HM, Whittle L, *et al.* Validation of the InnoWell Platform:  
57 Protocol for a Clinical Trial. *JMIR Res Protoc* 2019;**8**:e13955.doi:10.2196/13955  
58  
59  
60



- 1  
2  
3 46. LaMonica HM, Davenport TA, Braunstein K, *et al.* Technology-Enabled Person-  
4  
5 Centered Mental Health Services Reform: Strategy for Implementation Science. *JMIR Ment*  
6  
7 *Health* 2019;**6**:e14719-e.doi:10.2196/14719  
8  
9
- 10 47. Hickie IB, Davenport TA, Burns JM, *et al.* Project Synergy: co-designing technology-  
11  
12 enabled solutions for Australian mental health services reform. *Med J Aust* 2019;**211** Suppl  
13  
14 **7**:S3-s39.doi:10.5694/mja2.50349  
15  
16
- 17 48. Cuthbert BN. The RDoC framework: facilitating transition from ICD/DSM to  
18  
19 dimensional approaches that integrate neuroscience and psychopathology. *World Psychiatry*  
20  
21 2014;**13**:28-35.doi:10.1002/wps.20087  
22  
23
- 24 49. Iorfino F, Carpenter JS, Cross SP, *et al.* Multidimensional outcomes in youth mental  
25  
26 health care: what matters and why? . *MJA* accepted.doi:10.5694/mja2.50383  
27  
28
- 29 50. Kessler RC, Andrews G, Colpe LJ, *et al.* Short screening scales to monitor population  
30  
31 prevalences and trends in non-specific psychological distress. *Psychol Med* 2002;**32**:959-76  
32  
33
- 34 51. Andrews G, Slade T. Interpreting scores on the Kessler Psychological Distress Scale  
35  
36 (K10). *Aust N Z J Public Health* 2001;**25**:494-7  
37  
38
- 39 52. van Spijker BA, Batterham PJ, Calear AL, *et al.* The suicidal ideation attributes scale  
40  
41 (SIDAS): Community-based validation study of a new scale for the measurement of suicidal  
42  
43 ideation. *Suicide Life Threat Behav* 2014;**44**:408-19.doi:10.1111/sltb.12084  
44  
45
- 46 53. Posner K, Brown GK, Stanley B, *et al.* The Columbia-Suicide Severity Rating Scale: initial  
47  
48 validity and internal consistency findings from three multisite studies with adolescents and  
49  
50 adults. *Am J Psychiatry* 2011;**168**:1266-77.doi:10.1176/appi.ajp.2011.10111704  
51  
52
- 53 54. Ising HK, Veling W, Loewy RL, *et al.* The validity of the 16-item version of the Prodromal  
54  
55 Questionnaire (PQ-16) to screen for ultra high risk of developing psychosis in the general help-  
56  
57 seeking population. *Schizophr Bull* 2012;**38**:1288-96.doi:10.1093/schbul/sbs068  
58  
59  
60

- 1  
2  
3 55. Altman EG, Hedeker D, Peterson JL, *et al.* The Altman Self-Rating Mania Scale. *Biol*  
4  
5  
6 *Psychiatry* 1997;**42**:948-55.doi:10.1016/s0006-3223(96)00548-3  
7  
8 56. Üstün TB, Kostanjesek N, Chatterji S, *et al.* Measuring health and disability: manual for  
9  
10 WHO Disability Assessment Schedule (WHODAS 2.0).  
11  
12 <https://apps.who.int/iris/handle/10665/43974> World Health Organization 2010 [  
13  
14  
15 57. Mundt JC, Marks IM, Shear MK, *et al.* The Work and Social Adjustment Scale: a simple  
16  
17 measure of impairment in functioning. *Br J Psychiatry* 2002;**180**:461-4  
18  
19 58. Goldman HH, Skodol AE, Lave TR. Revising axis V for DSM-IV: a review of measures of  
20  
21 social functioning. *Am J Psychiatry* 1992;**149**:1148-56.doi:10.1176/ajp.149.9.1148  
22  
23 59. Whitlock J, Exner-Cortens D, Purington A. Assessment of nonsuicidal self-injury:  
24  
25 development and initial validation of the Non-Suicidal Self-Injury-Assessment Tool (NSSI-AT).  
26  
27  
28  
29 *Psychol Assess* 2014;**26**:935-46.doi:10.1037/a0036611  
30  
31 60. Humeniuk R, Ali R, Babor TF, *et al.* Validation of the Alcohol, Smoking And Substance  
32  
33 Involvement Screening Test (ASSIST). *Addiction* 2008;**103**:1039-47.doi:10.1111/j.1360-  
34  
35 0443.2007.02114.x  
36  
37  
38  
39 61. WHO ASSIST Working Group. The Alcohol, Smoking and Substance Involvement  
40  
41 Screening Test (ASSIST): development, reliability and feasibility. *Addiction* 2002;**97**:1183-94  
42  
43  
44 62. Bush K, Kivlahan DR, McDonell MB, *et al.* The AUDIT alcohol consumption questions  
45  
46 (AUDIT-C): an effective brief screening test for problem drinking. Ambulatory Care Quality  
47  
48 Improvement Project (ACQUIP). Alcohol Use Disorders Identification Test. *Arch Intern Med*  
49  
50  
51 1998;**158**:1789-95  
52  
53  
54 63. Schuster TL, Kessler RC, Aseltine RH, Jr. Supportive interactions, negative interactions,  
55  
56 and depressed mood. *Am J Community Psychol* 1990;**18**:423-38  
57  
58  
59  
60

- 1  
2  
3 64. Rush AJ, Trivedi MH, Ibrahim HM, *et al.* The 16-Item Quick Inventory of Depressive  
4 Symptomatology (QIDS), clinician rating (QIDS-C), and self-report (QIDS-SR): a psychometric  
5 evaluation in patients with chronic major depression. *Biol Psychiatry* 2003;**54**:573-83  
6  
7  
8  
9  
10 65. Norman SB, Cissell SH, Means-Christensen AJ, *et al.* Development and validation of an  
11 Overall Anxiety Severity And Impairment Scale (OASIS). *Depress Anxiety* 2006;**23**:245-  
12  
13 9.doi:10.1002/da.20182  
14  
15  
16  
17 66. Booth M. Assessment of physical activity: an international perspective. *Res Q Exerc*  
18 *Sport* 2000;**71**:S114-20  
19  
20  
21  
22 67. Craig CL, Marshall AL, Sjostrom M, *et al.* International physical activity questionnaire:  
23 12-country reliability and validity. *Med Sci Sports Exerc* 2003;**35**:1381-  
24  
25 95.doi:10.1249/01.MSS.0000078924.61453.FB  
26  
27  
28  
29 68. Buysse DJ, Reynolds CF, 3rd, Monk TH, *et al.* The Pittsburgh Sleep Quality Index: a new  
30 instrument for psychiatric practice and research. *Psychiatry Res* 1989;**28**:193-213  
31  
32  
33  
34 69. Zavada A, Gordijn MC, Beersma DG, *et al.* Comparison of the Munich Chronotype  
35 Questionnaire with the Horne-Ostberg's Morningness-Eveningness Score. *Chronobiol Int*  
36  
37 2005;**22**:267-78  
38  
39  
40  
41 70. Roenneberg T, Wirz-Justice A, Meroo M. Life between clocks: daily temporal patterns  
42 of human chronotypes. *J Biol Rhythms* 2003;**18**:80-90.doi:10.1177/0748730402239679  
43  
44  
45  
46 71. Prins A, Bovin MJ, Smolenski DJ, *et al.* The Primary Care PTSD Screen for DSM-5 (PC-  
47 PTSD-5): Development and Evaluation Within a Veteran Primary Care Sample. *J Gen Intern*  
48  
49 *Med* 2016;**31**:1206-11.doi:10.1007/s11606-016-3703-5  
50  
51  
52  
53 72. Fairburn CG, Cooper Z. The Eating Disorder Examination (12th edition). Binge eating:  
54 Nature, assessment, and treatment. New York, NY, US: Guilford Press; 1993. p. 317-60.  
55  
56  
57  
58  
59  
60

- 1  
2  
3 73. Hickie IB, Scott J, McGorry PD. Clinical staging for mental disorders: a new  
4 development in diagnostic practice in mental health. *Med J Aust* 2013;**198**:461-2  
5  
6  
7  
8 74. Sojo VE, Wood RE, Wood SA, *et al.* Reporting requirements, targets, and quotas for  
9 women in leadership. 2016;**27**:519 - 36.doi:10.1016/j.leaqua.2015.12.003  
10  
11  
12  
13 75. Lee RSC, Hermens DF, Scott J, *et al.* A transdiagnostic study of education, employment,  
14 and training outcomes in young people with mental illness. *Psychol Med* 2017;**47**:2061-  
15  
16  
17 70.doi:10.1017/s0033291717000484  
18  
19  
20 76. Iorfino F, Scott E, Carpenter JS, *et al.* Predictors of clinical stage transitions among  
21 young people presenting to early intervention services with anxiety, mood, or psychotic  
22 disorders. *JAMA Psychiatry* accepted  
23  
24  
25  
26  
27 77. Lee RSC, Hermens DF, Naismith SL, *et al.* Clinical, neurocognitive and demographic  
28 factors associated with functional impairment in the Australian Brain and Mind Youth Cohort  
29 Study (2008-2016). *BMJ Open* 2018;**8**:e022659.doi:10.1136/bmjopen-2018-022659  
30  
31  
32  
33  
34 78. Lee RS, Hermens DF, Naismith SL, *et al.* Neuropsychological and functional outcomes  
35 in recent-onset major depression, bipolar disorder and schizophrenia-spectrum disorders: a  
36 longitudinal cohort study. *Transl Psychiatry* 2015;**5**:e555.doi:10.1038/tp.2015.50  
37  
38  
39  
40  
41  
42 79. Hermens DF, Lagopoulos J, Naismith SL, *et al.* Distinct neurometabolic profiles are  
43 evident in the anterior cingulate of young people with major psychiatric disorders. *Transl*  
44  
45  
46  
47 *Psychiatry* 2012;**2**:e110.doi:10.1038/tp.2012.35  
48  
49  
50 80. Hermens DF, Naismith SL, Chitty KM, *et al.* Cluster analysis reveals abnormal  
51 hippocampal neurometabolic profiles in young people with mood disorders. *Eur*  
52  
53  
54  
55 *Neuropsychopharmacol* 2015;**25**:836-45.doi:10.1016/j.euroneuro.2015.02.009  
56  
57  
58  
59  
60

- 1  
2  
3 81. Tickell AM, Scott EM, Davenport T, *et al.* Developing neurocognitive standard clinical  
4 care: A study of young adult inpatients. *Psychiatry Res* 2019;**276**:232-  
5  
6  
7  
8 8.doi:10.1016/j.psychres.2019.05.003  
9
- 10 82. Tickell AM, Scott EM, Davenport T, *et al.* Neurocognitive clusters: A pilot study of young  
11 people with affective disorders in an inpatient facility. *J Affect Disord* 2019;**242**:80-  
12  
13  
14  
15 6.doi:10.1016/j.jad.2018.08.045  
16
- 17 83. Crouse JJ, Moustafa AA, Bogaty SER, *et al.* Parcellating cognitive heterogeneity in early  
18 psychosis-spectrum illnesses: A cluster analysis. *Schizophr Res* 2018;**202**:91-  
19  
20  
21  
22 8.doi:10.1016/j.schres.2018.06.060  
23
- 24 84. Crouse JJ, Chitty KM, Iorfino F, *et al.* Exploring associations between early substance  
25 use and longitudinal socio-occupational functioning in young people engaged in a mental  
26 health service. *PLoS ONE* 2019;**14**:e0210877.doi:10.1371/journal.pone.0210877  
27  
28  
29
- 30 85. Iorfino F, Hermens DF, Shane P, *et al.* Delineating the trajectories of social and  
31 occupational functioning of young people attending early intervention mental health services  
32 in Australia: a longitudinal study. *BMJ open* 2018;**8**:e020678  
33  
34  
35  
36  
37  
38  
39  
40  
41

## Contributors

42  
43  
44  
45 IBH conceived the research idea, designed the study, and is the principal investigator. CR and  
46  
47  
48 YJCS contributed to study conception and wrote the study protocol with input of IBH, JJC, TAD,  
49  
50  
51 FI, BH, NZ, AN, JSC, AMT, CW, SPC, AJG, DK, FML, EMS. CR wrote the manuscript with input of  
52  
53  
54 IBH, YJCS, JJC, TAD, FI, BH, NZ, AN, JSC, and AMT. All authors critically reviewed content and  
55  
56  
57 approved the final version of the publication.  
58  
59  
60

## Funding

1  
2  
3 This project is an investigator-initiated trial and will be supported by philanthropic funding,  
4  
5 for which donor(s) who are families affected and wish to remain anonymous. IBH is supported  
6  
7 by a National Health and Medical Research Council (NHMRC) Senior Principle Research  
8  
9 Fellowship grant number 1136259.  
10  
11  
12  
13  
14  
15  
16  
17

## 18 Competing interests

19  
20  
21 Project Synergy (2014–2016) was commissioned by the Department of Health and conducted  
22  
23 by the Young and Well Cooperative Research Centre (Young and Well CRC) in partnership with  
24  
25 the University of Sydney's Brain and Mind Centre. The Department of Health (Australian  
26  
27 Government) has further supported Project Synergy through a significant investment over 3  
28  
29 years (2017–2020) which led to the development of InnoWell Pty Ltd, a joint venture between  
30  
31 the University of Sydney and PricewaterhouseCoopers (Australia) (PwC). The University of  
32  
33 Sydney and PwC (Australia) each have a 45% shareholding in InnoWell. The remaining 10%  
34  
35 shareholding is evenly shared between Professor Jane Burns and Professor Ian Hickie.  
36  
37  
38  
39  
40  
41  
42

## 43 Legends

44  
45  
46 **Figure 1: Overview of study visits.** After completing the baseline visit, participants will be  
47  
48 followed-up once yearly. During each visit, self-report questionnaires and clinical routine  
49  
50 assessments have to be completed. In addition, participants will be asked to complete self-  
51  
52 report questionnaires also 3 and 6 months after study start.  
53  
54  
55  
56  
57  
58  
59  
60

1  
2  
3  
4  
5  
6  
7  
8  
9  
10  
11  
12  
13  
14  
15  
16  
17  
18  
19  
20  
21  
22  
23  
24  
25  
26  
27  
28  
29  
30  
31  
32  
33  
34  
35  
36  
37  
38  
39  
40  
41  
42  
43  
44  
45  
46  
47  
48  
49  
50  
51  
52  
53  
54  
55  
56  
57  
58  
59  
60

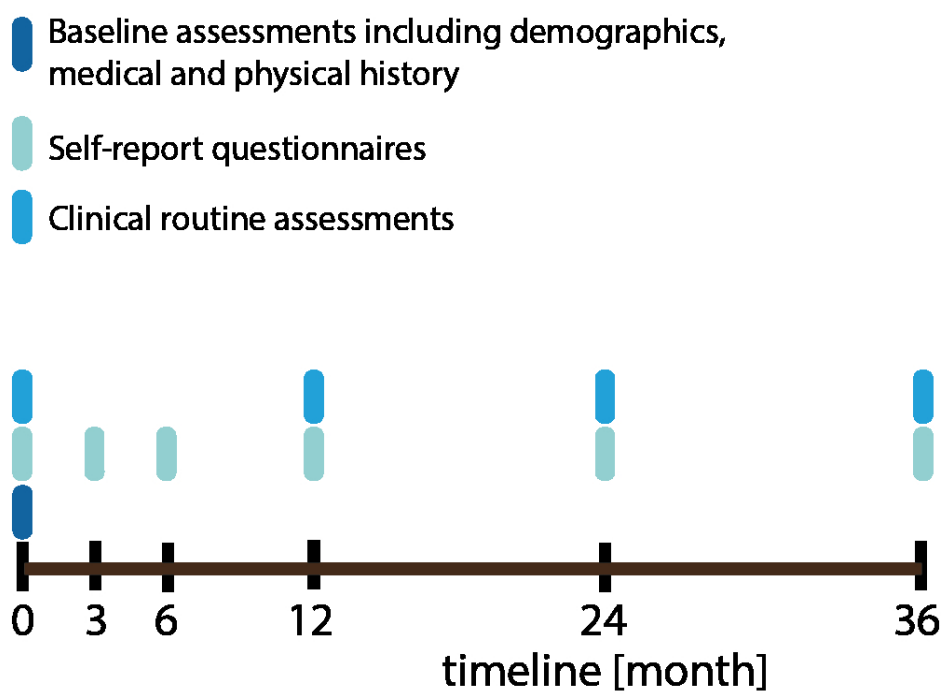

Overview of study visits. / After completing the baseline visit, participants will be followed-up once yearly. During each visit, self-report questionnaires and clinical routine assessments have to be completed. In addition, participants will be asked to complete self-report questionnaires also 3 and 6 months after study start.

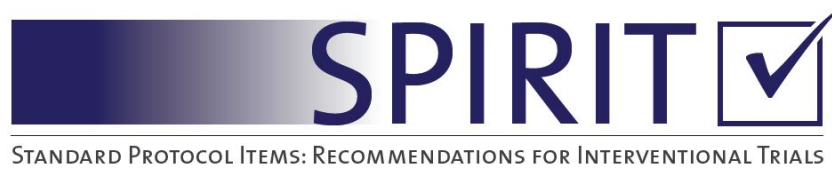

SPIRIT 2013 Checklist: Recommended items to address in a clinical trial protocol and related documents\*

| Section/item                      | Item No | Description                                                                                                                                                                                                                                                                              | Reported on page # |
|-----------------------------------|---------|------------------------------------------------------------------------------------------------------------------------------------------------------------------------------------------------------------------------------------------------------------------------------------------|--------------------|
| <b>Administrative information</b> |         |                                                                                                                                                                                                                                                                                          |                    |
| Title                             | 1       | Descriptive title identifying the study design, population, interventions, and, if applicable, trial acronym                                                                                                                                                                             | 1                  |
| Trial registration                | 2a      | Trial identifier and registry name. If not yet registered, name of intended registry                                                                                                                                                                                                     | NA                 |
|                                   | 2b      | All items from the World Health Organization Trial Registration Data Set                                                                                                                                                                                                                 | NA                 |
| Protocol version                  | 3       | Date and version identifier                                                                                                                                                                                                                                                              | 14                 |
| Funding                           | 4       | Sources and types of financial, material, and other support                                                                                                                                                                                                                              | 23                 |
| Roles and responsibilities        | 5a      | Names, affiliations, and roles of protocol contributors                                                                                                                                                                                                                                  | 1                  |
|                                   | 5b      | Name and contact information for the trial sponsor                                                                                                                                                                                                                                       | NA                 |
|                                   | 5c      | Role of study sponsor and funders, if any, in study design; collection, management, analysis, and interpretation of data; writing of the report; and the decision to submit the report for publication, including whether they will have ultimate authority over any of these activities | NA                 |
|                                   | 5d      | Composition, roles, and responsibilities of the coordinating centre, steering committee, endpoint adjudication committee, data management team, and other individuals or groups overseeing the trial, if applicable (see Item 21a for data monitoring committee)                         | NA                 |
| <b>Introduction</b>               |         |                                                                                                                                                                                                                                                                                          |                    |
| Background and rationale          | 6a      | Description of research question and justification for undertaking the trial, including summary of relevant studies (published and unpublished) examining benefits and harms for each intervention                                                                                       | 4-6                |
|                                   | 6b      | Explanation for choice of comparators                                                                                                                                                                                                                                                    | NA                 |
| Objectives                        | 7       | Specific objectives or hypotheses                                                                                                                                                                                                                                                        | 6-7                |



|    |                                                                     |     |                                                                                                                                                                                                                                                                                                                                                                                |                |
|----|---------------------------------------------------------------------|-----|--------------------------------------------------------------------------------------------------------------------------------------------------------------------------------------------------------------------------------------------------------------------------------------------------------------------------------------------------------------------------------|----------------|
| 1  |                                                                     |     |                                                                                                                                                                                                                                                                                                                                                                                |                |
| 2  | Trial design                                                        | 8   | Description of trial design including type of trial (eg, parallel group, crossover, factorial, single group), allocation ratio, and framework (eg, superiority, equivalence, noninferiority, exploratory)                                                                                                                                                                      | 7              |
| 3  |                                                                     |     |                                                                                                                                                                                                                                                                                                                                                                                |                |
| 4  |                                                                     |     |                                                                                                                                                                                                                                                                                                                                                                                |                |
| 5  |                                                                     |     |                                                                                                                                                                                                                                                                                                                                                                                |                |
| 6  |                                                                     |     |                                                                                                                                                                                                                                                                                                                                                                                |                |
| 7  |                                                                     |     |                                                                                                                                                                                                                                                                                                                                                                                |                |
| 8  | <b>Methods: Participants, interventions, and outcomes</b>           |     |                                                                                                                                                                                                                                                                                                                                                                                |                |
| 9  |                                                                     |     |                                                                                                                                                                                                                                                                                                                                                                                |                |
| 10 | Study setting                                                       | 9   | Description of study settings (eg, community clinic, academic hospital) and list of countries where data will be collected. Reference to where list of study sites can be obtained                                                                                                                                                                                             | 7              |
| 11 |                                                                     |     |                                                                                                                                                                                                                                                                                                                                                                                |                |
| 12 |                                                                     |     |                                                                                                                                                                                                                                                                                                                                                                                |                |
| 13 |                                                                     |     |                                                                                                                                                                                                                                                                                                                                                                                |                |
| 14 | Eligibility criteria                                                | 10  | Inclusion and exclusion criteria for participants. If applicable, eligibility criteria for study centres and individuals who will perform the interventions (eg, surgeons, psychotherapists)                                                                                                                                                                                   | 8-9            |
| 15 |                                                                     |     |                                                                                                                                                                                                                                                                                                                                                                                |                |
| 16 |                                                                     |     |                                                                                                                                                                                                                                                                                                                                                                                |                |
| 17 |                                                                     |     |                                                                                                                                                                                                                                                                                                                                                                                |                |
| 18 | Interventions                                                       | 11a | Interventions for each group with sufficient detail to allow replication, including how and when they will be administered                                                                                                                                                                                                                                                     | NA             |
| 19 |                                                                     |     |                                                                                                                                                                                                                                                                                                                                                                                |                |
| 20 |                                                                     |     |                                                                                                                                                                                                                                                                                                                                                                                |                |
| 21 |                                                                     |     |                                                                                                                                                                                                                                                                                                                                                                                |                |
| 22 |                                                                     | 11b | Criteria for discontinuing or modifying allocated interventions for a given trial participant (eg, drug dose change in response to harms, participant request, or improving/worsening disease)                                                                                                                                                                                 | NA             |
| 23 |                                                                     |     |                                                                                                                                                                                                                                                                                                                                                                                |                |
| 24 |                                                                     |     |                                                                                                                                                                                                                                                                                                                                                                                |                |
| 25 |                                                                     |     |                                                                                                                                                                                                                                                                                                                                                                                |                |
| 26 |                                                                     |     |                                                                                                                                                                                                                                                                                                                                                                                |                |
| 27 |                                                                     |     |                                                                                                                                                                                                                                                                                                                                                                                |                |
| 28 |                                                                     | 11c | Strategies to improve adherence to intervention protocols, and any procedures for monitoring adherence (eg, drug tablet return, laboratory tests)                                                                                                                                                                                                                              | NA             |
| 29 |                                                                     |     |                                                                                                                                                                                                                                                                                                                                                                                |                |
| 30 |                                                                     |     |                                                                                                                                                                                                                                                                                                                                                                                |                |
| 31 |                                                                     |     |                                                                                                                                                                                                                                                                                                                                                                                |                |
| 32 |                                                                     | 11d | Relevant concomitant care and interventions that are permitted or prohibited during the trial                                                                                                                                                                                                                                                                                  | NA             |
| 33 |                                                                     |     |                                                                                                                                                                                                                                                                                                                                                                                |                |
| 34 |                                                                     |     |                                                                                                                                                                                                                                                                                                                                                                                |                |
| 35 | Outcomes                                                            | 12  | Primary, secondary, and other outcomes, including the specific measurement variable (eg, systolic blood pressure), analysis metric (eg, change from baseline, final value, time to event), method of aggregation (eg, median, proportion), and time point for each outcome. Explanation of the clinical relevance of chosen efficacy and harm outcomes is strongly recommended | 13             |
| 36 |                                                                     |     |                                                                                                                                                                                                                                                                                                                                                                                |                |
| 37 |                                                                     |     |                                                                                                                                                                                                                                                                                                                                                                                |                |
| 38 |                                                                     |     |                                                                                                                                                                                                                                                                                                                                                                                |                |
| 39 |                                                                     |     |                                                                                                                                                                                                                                                                                                                                                                                |                |
| 40 |                                                                     |     |                                                                                                                                                                                                                                                                                                                                                                                |                |
| 41 |                                                                     |     |                                                                                                                                                                                                                                                                                                                                                                                |                |
| 42 |                                                                     |     |                                                                                                                                                                                                                                                                                                                                                                                |                |
| 43 |                                                                     |     |                                                                                                                                                                                                                                                                                                                                                                                |                |
| 44 |                                                                     |     |                                                                                                                                                                                                                                                                                                                                                                                |                |
| 45 | Participant timeline                                                | 13  | Time schedule of enrolment, interventions (including any run-ins and washouts), assessments, and visits for participants. A schematic diagram is highly recommended (see Figure)                                                                                                                                                                                               | Figure 1, 8-12 |
| 46 |                                                                     |     |                                                                                                                                                                                                                                                                                                                                                                                |                |
| 47 |                                                                     |     |                                                                                                                                                                                                                                                                                                                                                                                |                |
| 48 |                                                                     |     |                                                                                                                                                                                                                                                                                                                                                                                |                |
| 49 | Sample size                                                         | 14  | Estimated number of participants needed to achieve study objectives and how it was determined, including clinical and statistical assumptions supporting any sample size calculations                                                                                                                                                                                          | 12             |
| 50 |                                                                     |     |                                                                                                                                                                                                                                                                                                                                                                                |                |
| 51 |                                                                     |     |                                                                                                                                                                                                                                                                                                                                                                                |                |
| 52 |                                                                     |     |                                                                                                                                                                                                                                                                                                                                                                                |                |
| 53 |                                                                     |     |                                                                                                                                                                                                                                                                                                                                                                                |                |
| 54 |                                                                     |     |                                                                                                                                                                                                                                                                                                                                                                                |                |
| 55 | Recruitment                                                         | 15  | Strategies for achieving adequate participant enrolment to reach target sample size                                                                                                                                                                                                                                                                                            | 9              |
| 56 |                                                                     |     |                                                                                                                                                                                                                                                                                                                                                                                |                |
| 57 |                                                                     |     |                                                                                                                                                                                                                                                                                                                                                                                |                |
| 58 | <b>Methods: Assignment of interventions (for controlled trials)</b> |     |                                                                                                                                                                                                                                                                                                                                                                                | <b>NA</b>      |
| 59 |                                                                     |     |                                                                                                                                                                                                                                                                                                                                                                                |                |
| 60 |                                                                     |     |                                                                                                                                                                                                                                                                                                                                                                                |                |

## Allocation:

|                                  |     |                                                                                                                                                                                                                                                                                                                                                          |  |
|----------------------------------|-----|----------------------------------------------------------------------------------------------------------------------------------------------------------------------------------------------------------------------------------------------------------------------------------------------------------------------------------------------------------|--|
| Sequence generation              | 16a | Method of generating the allocation sequence (eg, computer-generated random numbers), and list of any factors for stratification. To reduce predictability of a random sequence, details of any planned restriction (eg, blocking) should be provided in a separate document that is unavailable to those who enrol participants or assign interventions |  |
| Allocation concealment mechanism | 16b | Mechanism of implementing the allocation sequence (eg, central telephone; sequentially numbered, opaque, sealed envelopes), describing any steps to conceal the sequence until interventions are assigned                                                                                                                                                |  |
| Implementation                   | 16c | Who will generate the allocation sequence, who will enrol participants, and who will assign participants to interventions                                                                                                                                                                                                                                |  |
| Blinding (masking)               | 17a | Who will be blinded after assignment to interventions (eg, trial participants, care providers, outcome assessors, data analysts), and how                                                                                                                                                                                                                |  |
|                                  | 17b | If blinded, circumstances under which unblinding is permissible, and procedure for revealing a participant's allocated intervention during the trial                                                                                                                                                                                                     |  |

**Methods: Data collection, management, and analysis**

|                         |     |                                                                                                                                                                                                                                                                                                                                                                                                              |       |
|-------------------------|-----|--------------------------------------------------------------------------------------------------------------------------------------------------------------------------------------------------------------------------------------------------------------------------------------------------------------------------------------------------------------------------------------------------------------|-------|
| Data collection methods | 18a | Plans for assessment and collection of outcome, baseline, and other trial data, including any related processes to promote data quality (eg, duplicate measurements, training of assessors) and a description of study instruments (eg, questionnaires, laboratory tests) along with their reliability and validity, if known. Reference to where data collection forms can be found, if not in the protocol | 10-12 |
|                         | 18b | Plans to promote participant retention and complete follow-up, including list of any outcome data to be collected for participants who discontinue or deviate from intervention protocols                                                                                                                                                                                                                    | 9     |
| Data management         | 19  | Plans for data entry, coding, security, and storage, including any related processes to promote data quality (eg, double data entry; range checks for data values). Reference to where details of data management procedures can be found, if not in the protocol                                                                                                                                            | 7     |
| Statistical methods     | 20a | Statistical methods for analysing primary and secondary outcomes. Reference to where other details of the statistical analysis plan can be found, if not in the protocol                                                                                                                                                                                                                                     | 13    |
|                         | 20b | Methods for any additional analyses (eg, subgroup and adjusted analyses)                                                                                                                                                                                                                                                                                                                                     | 13    |

|    |                                 |     |                                                                  |           |
|----|---------------------------------|-----|------------------------------------------------------------------|-----------|
| 1  |                                 |     |                                                                  |           |
| 2  |                                 | 20c | Definition of analysis population relating to protocol non-      |           |
| 3  |                                 |     | adherence (eg, as randomised analysis), and any statistical      | NA        |
| 4  |                                 |     | methods to handle missing data (eg, multiple imputation)         |           |
| 5  |                                 |     |                                                                  |           |
| 6  | <b>Methods: Monitoring</b>      |     |                                                                  | <b>NA</b> |
| 7  |                                 |     |                                                                  |           |
| 8  | Data monitoring                 | 21a | Composition of data monitoring committee (DMC); summary          |           |
| 9  |                                 |     | of its role and reporting structure; statement of whether it is  |           |
| 10 |                                 |     | independent from the sponsor and competing interests; and        |           |
| 11 |                                 |     | reference to where further details about its charter can be      |           |
| 12 |                                 |     | found, if not in the protocol. Alternatively, an explanation of  |           |
| 13 |                                 |     | why a DMC is not needed                                          |           |
| 14 |                                 |     |                                                                  |           |
| 15 |                                 |     |                                                                  |           |
| 16 |                                 | 21b | Description of any interim analyses and stopping guidelines,     |           |
| 17 |                                 |     | including who will have access to these interim results and      |           |
| 18 |                                 |     | make the final decision to terminate the trial                   |           |
| 19 |                                 |     |                                                                  |           |
| 20 |                                 |     |                                                                  |           |
| 21 | Harms                           | 22  | Plans for collecting, assessing, reporting, and managing         |           |
| 22 |                                 |     | solicited and spontaneously reported adverse events and          |           |
| 23 |                                 |     | other unintended effects of trial interventions or trial conduct |           |
| 24 |                                 |     |                                                                  |           |
| 25 | Auditing                        | 23  | Frequency and procedures for auditing trial conduct, if any,     |           |
| 26 |                                 |     | and whether the process will be independent from                 |           |
| 27 |                                 |     | investigators and the sponsor                                    |           |
| 28 |                                 |     |                                                                  |           |
| 29 |                                 |     |                                                                  |           |
| 30 | <b>Ethics and dissemination</b> |     |                                                                  |           |
| 31 |                                 |     |                                                                  |           |
| 32 | Research ethics                 | 24  | Plans for seeking research ethics committee/institutional        |           |
| 33 | approval                        |     | review board (REC/IRB) approval                                  | 14        |
| 34 |                                 |     |                                                                  |           |
| 35 | Protocol                        | 25  | Plans for communicating important protocol modifications (eg,    |           |
| 36 | amendments                      |     | changes to eligibility criteria, outcomes, analyses) to relevant |           |
| 37 |                                 |     | parties (eg, investigators, REC/IRBs, trial participants, trial  | 14        |
| 38 |                                 |     | registries, journals, regulators)                                |           |
| 39 |                                 |     |                                                                  |           |
| 40 |                                 |     |                                                                  |           |
| 41 | Consent or assent               | 26a | Who will obtain informed consent or assent from potential trial  |           |
| 42 |                                 |     | participants or authorised surrogates, and how (see Item 32)     | 14        |
| 43 |                                 |     |                                                                  |           |
| 44 |                                 | 26b | Additional consent provisions for collection and use of          |           |
| 45 |                                 |     | participant data and biological specimens in ancillary studies,  |           |
| 46 |                                 |     | if applicable                                                    | NA        |
| 47 |                                 |     |                                                                  |           |
| 48 |                                 |     |                                                                  |           |
| 49 | Confidentiality                 | 27  | How personal information about potential and enrolled            |           |
| 50 |                                 |     | participants will be collected, shared, and maintained in order  |           |
| 51 |                                 |     | to protect confidentiality before, during, and after the trial   | 14        |
| 52 |                                 |     |                                                                  |           |
| 53 | Declaration of                  | 28  | Financial and other competing interests for principal            |           |
| 54 | interests                       |     | investigators for the overall trial and each study site          | 24        |
| 55 |                                 |     |                                                                  |           |
| 56 | Access to data                  | 29  | Statement of who will have access to the final trial dataset,    |           |
| 57 |                                 |     | and disclosure of contractual agreements that limit such         |           |
| 58 |                                 |     | access for investigators                                         | NA        |
| 59 |                                 |     |                                                                  |           |
| 60 |                                 |     |                                                                  |           |

|    |                   |     |                                                                      |    |
|----|-------------------|-----|----------------------------------------------------------------------|----|
| 1  |                   |     |                                                                      |    |
| 2  | Ancillary and     | 30  | Provisions, if any, for ancillary and post-trial care, and for       |    |
| 3  | post-trial care   |     | compensation to those who suffer harm from trial participation       | NA |
| 4  |                   |     |                                                                      |    |
| 5  | Dissemination     | 31a | Plans for investigators and sponsor to communicate trial             |    |
| 6  | policy            |     | results to participants, healthcare professionals, the public,       |    |
| 7  |                   |     | and other relevant groups (eg, via publication, reporting in         | 14 |
| 8  |                   |     | results databases, or other data sharing arrangements),              |    |
| 9  |                   |     | including any publication restrictions                               |    |
| 10 |                   |     |                                                                      |    |
| 11 |                   | 31b | Authorship eligibility guidelines and any intended use of            |    |
| 12 |                   |     | professional writers                                                 | NA |
| 13 |                   |     |                                                                      |    |
| 14 |                   | 31c | Plans, if any, for granting public access to the full protocol,      |    |
| 15 |                   |     | participant-level dataset, and statistical code                      | NA |
| 16 |                   |     |                                                                      |    |
| 17 |                   |     |                                                                      |    |
| 18 |                   |     |                                                                      |    |
| 19 | <b>Appendices</b> |     |                                                                      |    |
| 20 |                   |     |                                                                      |    |
| 21 | Informed consent  | 32  | Model consent form and other related documentation given to          |    |
| 22 | materials         |     | participants and authorised surrogates                               | NA |
| 23 |                   |     |                                                                      |    |
| 24 | Biological        | 33  | Plans for collection, laboratory evaluation, and storage of          |    |
| 25 | specimens         |     | biological specimens for genetic or molecular analysis in the        | NA |
| 26 |                   |     | current trial and for future use in ancillary studies, if applicable |    |
| 27 |                   |     |                                                                      |    |

\*It is strongly recommended that this checklist be read in conjunction with the SPIRIT 2013 Explanation & Elaboration for important clarification on the items. Amendments to the protocol should be tracked and dated. The SPIRIT checklist is copyrighted by the SPIRIT Group under the Creative Commons "[Attribution-NonCommercial-NoDerivs 3.0 Unported](https://creativecommons.org/licenses/by-nc-nd/3.0/)" license.
